# Supplementary material for: Concentration‐QTc and cardiac safety analysis of single and multiple zavegepant nasal spray doses in healthy participants to support approval
Source: PubMed Central journal article supplement — CPT Pharmacometrics Syst Pharmacol. 2024 May 29;13(6):1044–54. doi: 10.1002/psp4.13140 (PMC11179704; doi:10.1002/psp4.13140), 2024-05-29
Supplement: PSP4-13-1044-s001.pdf [file PSP4-13-1044-s001.pdf]

Concentration-QTc and cardiac safety analysis of single and multiple  
zavegepant nasal spray doses in healthy participants to support approval

Jim H. Hughes<sup>1</sup>, Richard Bertz<sup>2</sup>, Rajinder Bhardwaj<sup>3</sup>, Mary K. Donohue<sup>2</sup>, Jennifer Madonia<sup>2</sup>,  
Matt S. Anderson<sup>3</sup>, Beth Morris<sup>2</sup>, Robert S. Croop<sup>2</sup>, Jing Liu<sup>1</sup>

<sup>1</sup>Pfizer Inc., Groton, Connecticut, USA

<sup>2</sup>Biohaven Pharmaceuticals Inc., New Haven, Connecticut, USA

<sup>3</sup>Certara USA, Princeton, New Jersey, USA

**Table S1.** Concentration-QTc analysis of zavegepant and associated  $\Delta\Delta\text{QTcF}$  prolongation (SAD and MAD studies pooled) (PK/QTc analysis population)

| Parameter                       | Estimate      | SE     | df     | t-Value | P Value  | 90% CI            |
|---------------------------------|---------------|--------|--------|---------|----------|-------------------|
| Treatment effect (ms)           | 0.99          | 1.1783 | 116.7  | 0.84    | 0.4012   | -0.961, 2.946     |
| Zavegepant slope (ms per ng/mL) | -0.053        | 0.0246 | 22.2   | -2.16   | 0.0415   | -0.0955, -0.0110  |
| Centered baseline effect (ms)   | -0.056        | 0.0235 | 123.3  | -2.37   | 0.0191   | -0.0949, -0.0169  |
| <b>Day 1 post-dose effect</b>   |               |        |        |         |          |                   |
| Hours post dose                 | Estimate (ms) | SE     | df     | t-Value | P Value  | 90% CI            |
| 0.33                            | -0.49         | 1.1147 | 168.0  | -0.44   | 0.6613   | -2.333, 1.355     |
| 0.5                             | -1.82         | 1.1177 | 169.9  | -1.63   | 0.1048   | -3.671, 0.026     |
| 0.67                            | -2.11         | 1.1265 | 175.3  | -1.88   | 0.0622   | -3.977, -0.252    |
| 0.83                            | -2.46         | 1.1142 | 168.1  | -2.20   | 0.0288   | -4.300, -0.614    |
| 1                               | -1.71         | 1.1109 | 166.3  | -1.54   | 0.1265   | -3.544, 0.131     |
| 1.5                             | -1.10         | 1.1110 | 166.3  | -0.99   | 0.3248   | -2.935, 0.741     |
| 2                               | -1.77         | 1.1198 | 171.6  | -1.58   | 0.1154   | -3.624, 0.080     |
| 2.5                             | -1.79         | 1.1086 | 165.0  | -1.61   | 0.1086   | -3.622, 0.046     |
| 3                               | -2.20         | 1.1092 | 165.3  | -1.99   | 0.0488   | -4.037, -0.367    |
| 3.5                             | -1.78         | 1.1087 | 165.0  | -1.60   | 0.1105   | -3.613, 0.055     |
| 4                               | -0.87         | 1.1090 | 165.1  | -0.78   | 0.4337   | -2.705, 0.964     |
| 4.5                             | 0.0039        | 1.1100 | 165.7  | 0.00    | 0.9972   | -1.83216, 1.83993 |
| 5                               | -1.47         | 1.1096 | 165.4  | -1.33   | 0.1866   | -3.307, 0.364     |
| 6                               | -1.87         | 1.1101 | 165.6  | -1.69   | 0.0935   | -3.709, -0.037    |
| 8                               | -5.87         | 1.1107 | 165.9  | -5.28   | < 0.0001 | -7.707, -4.032    |
| 12                              | -2.97         | 1.1112 | 166.2  | -2.67   | 0.0083   | -4.806, -1.130    |
| 24                              | -4.70         | 1.1188 | 170.8  | -4.20   | < 0.0001 | -6.554, -2.854    |
| <b>Day 8 post-dose effect</b>   |               |        |        |         |          |                   |
| Hours post dose                 | Estimate (ms) | SE     | df     | t-Value | P Value  | 90% CI            |
| -0.75                           | -9.46         | 1.8381 | 976.0  | -5.15   | < 0.0001 | -12.486, -6.433   |
| 0.33                            | -5.55         | 1.8704 | 1051.5 | -2.97   | 0.0031   | -8.633, -2.474    |
| 0.5                             | -7.22         | 1.8187 | 973.6  | -3.97   | < 0.0001 | -10.218, -4.229   |
| 0.83                            | -6.47         | 1.8186 | 971.3  | -3.56   | 0.0004   | -9.465, -3.477    |
| 1                               | -7.40         | 1.8179 | 967.2  | -4.07   | < 0.0001 | -10.389, -4.403   |
| 1.5                             | -5.95         | 1.8197 | 965.9  | -3.27   | 0.0011   | -8.949, -2.957    |
| 2.5                             | -7.32         | 1.8227 | 981.9  | -4.02   | < 0.0001 | -10.321, -4.319   |
| 3                               | -6.26         | 1.8197 | 971.6  | -3.44   | 0.0006   | -9.255, -3.263    |
| 3.5                             | -6.34         | 1.8176 | 964.9  | -3.49   | 0.0005   | -9.331, -3.346    |
| 4                               | -5.60         | 1.8182 | 963.1  | -3.08   | 0.0021   | -8.594, -2.607    |
| 4.5                             | -5.61         | 1.8204 | 963.1  | -3.08   | 0.0021   | -8.609, -2.615    |
| 5                               | -4.84         | 1.8219 | 963.9  | -2.66   | 0.0080   | -7.840, -1.840    |
| 6                               | 2.37          | 1.8250 | 966.1  | 1.30    | 0.1951   | -0.638, 5.371     |
| 8                               | -5.59         | 1.8311 | 970.7  | -3.05   | 0.0023   | -8.604, -2.574    |
| 12                              | -3.97         | 1.8349 | 973.8  | -2.16   | 0.0307   | -6.991, -0.949    |
| 24                              | -6.19         | 1.8385 | 976.1  | -3.37   | 0.0008   | -9.217, -3.164    |

Supplementary Information

| Parameter                                                                                                                                                                                                                                                                                                                                                                                                                                                                                                                                                                                                                                                                                                               | Estimate      | SE     | df    | t-Value | P Value  | 90% CI          |
|-------------------------------------------------------------------------------------------------------------------------------------------------------------------------------------------------------------------------------------------------------------------------------------------------------------------------------------------------------------------------------------------------------------------------------------------------------------------------------------------------------------------------------------------------------------------------------------------------------------------------------------------------------------------------------------------------------------------------|---------------|--------|-------|---------|----------|-----------------|
| <b>Day 14 post-dose</b>                                                                                                                                                                                                                                                                                                                                                                                                                                                                                                                                                                                                                                                                                                 |               |        |       |         |          |                 |
| Hours post dose                                                                                                                                                                                                                                                                                                                                                                                                                                                                                                                                                                                                                                                                                                         | Estimate (ms) | SE     | df    | t-Value | P Value  | 90% CI          |
| -0.75                                                                                                                                                                                                                                                                                                                                                                                                                                                                                                                                                                                                                                                                                                                   | -7.40         | 1.3473 | 348.9 | -5.49   | < 0.0001 | -9.620, -5.176  |
| 0.33                                                                                                                                                                                                                                                                                                                                                                                                                                                                                                                                                                                                                                                                                                                    | -3.27         | 1.3389 | 341.7 | -2.44   | 0.0150   | -5.480, -1.064  |
| 0.5                                                                                                                                                                                                                                                                                                                                                                                                                                                                                                                                                                                                                                                                                                                     | -4.74         | 1.3460 | 348.2 | -3.52   | 0.0005   | -6.963, -2.523  |
| 0.67                                                                                                                                                                                                                                                                                                                                                                                                                                                                                                                                                                                                                                                                                                                    | -4.33         | 1.3460 | 348.6 | -3.21   | 0.0014   | -6.546, -2.106  |
| 0.83                                                                                                                                                                                                                                                                                                                                                                                                                                                                                                                                                                                                                                                                                                                    | -5.12         | 1.3422 | 345.7 | -3.81   | 0.0002   | -7.334, -2.907  |
| 1                                                                                                                                                                                                                                                                                                                                                                                                                                                                                                                                                                                                                                                                                                                       | -4.28         | 1.3380 | 342.1 | -3.20   | 0.0015   | -6.482, -2.068  |
| 1.5                                                                                                                                                                                                                                                                                                                                                                                                                                                                                                                                                                                                                                                                                                                     | -3.62         | 1.3344 | 338.6 | -2.71   | 0.0071   | -5.818, -1.417  |
| 2                                                                                                                                                                                                                                                                                                                                                                                                                                                                                                                                                                                                                                                                                                                       | -4.33         | 1.3336 | 337.6 | -3.25   | 0.0013   | -6.530, -2.131  |
| 2.5                                                                                                                                                                                                                                                                                                                                                                                                                                                                                                                                                                                                                                                                                                                     | -3.84         | 1.3338 | 337.5 | -2.88   | 0.0042   | -6.044, -1.644  |
| 3                                                                                                                                                                                                                                                                                                                                                                                                                                                                                                                                                                                                                                                                                                                       | -4.03         | 1.3344 | 337.8 | -3.02   | 0.0027   | -6.231, -1.829  |
| 3.5                                                                                                                                                                                                                                                                                                                                                                                                                                                                                                                                                                                                                                                                                                                     | -4.70         | 1.3349 | 338.1 | -3.52   | 0.0005   | -6.897, -2.494  |
| 4                                                                                                                                                                                                                                                                                                                                                                                                                                                                                                                                                                                                                                                                                                                       | -2.89         | 1.3354 | 338.4 | -2.16   | 0.0312   | -5.092, -0.687  |
| 4.5                                                                                                                                                                                                                                                                                                                                                                                                                                                                                                                                                                                                                                                                                                                     | -2.59         | 1.3359 | 338.7 | -1.94   | 0.0531   | -4.796, -0.390  |
| 5                                                                                                                                                                                                                                                                                                                                                                                                                                                                                                                                                                                                                                                                                                                       | -2.46         | 1.3363 | 339.0 | -1.84   | 0.0663   | -4.666, -0.258  |
| 6                                                                                                                                                                                                                                                                                                                                                                                                                                                                                                                                                                                                                                                                                                                       | -0.55         | 1.3370 | 339.5 | -0.41   | 0.6835   | -2.751, 1.660   |
| 8                                                                                                                                                                                                                                                                                                                                                                                                                                                                                                                                                                                                                                                                                                                       | -4.67         | 1.3379 | 340.1 | -3.49   | 0.0005   | -6.874, -2.461  |
| 12                                                                                                                                                                                                                                                                                                                                                                                                                                                                                                                                                                                                                                                                                                                      | -3.22         | 1.3386 | 340.6 | -2.41   | 0.0166   | -5.430, -1.014  |
| 24                                                                                                                                                                                                                                                                                                                                                                                                                                                                                                                                                                                                                                                                                                                      | -7.95         | 1.3569 | 358.4 | -5.86   | < 0.0001 | -10.192, -5.717 |
| <p>Based on a linear mixed-effects model with <math>\Delta</math>QTcF as the dependent variable, time-matched zavegepant plasma concentration as an explanatory variate, centered baseline QTcF as an additional covariate, treatment (active = 1 or placebo = 0) and time as fixed effects, and a random intercept and slope per subject. <math>\Delta</math>QTcF, change from baseline in corrected QT interval using Fridericia's formula; <math>\Delta\Delta</math>QTcF, placebo-corrected change-from-baseline in QT interval using Fridericia's formula. CI, confidence interval; df, degrees of freedom; MAD, multiple-ascending dose; PK, pharmacokinetics; SAD, single-ascending dose; SE, standard error.</p> |               |        |       |         |          |                 |

**Figure S1.**  $\Delta$ HR by time, dose, and study

**A. LS mean  $\Delta$ HR across time points (SAD study QT/QTc analysis population)**

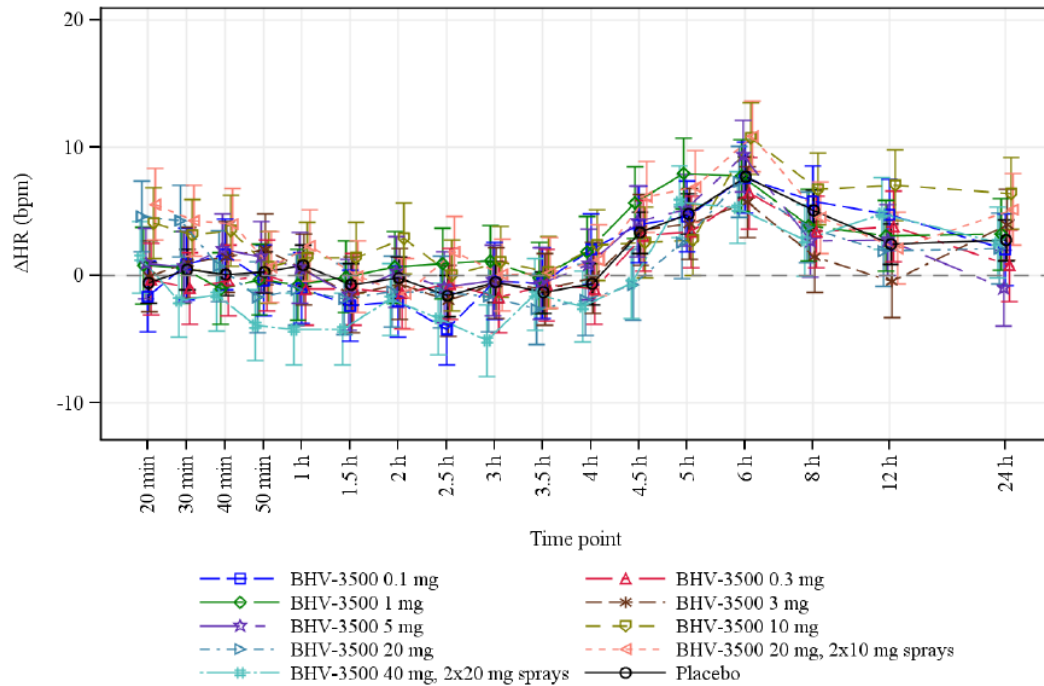

Notes: LS mean and 90% CI based on a linear mixed-effects model.

$\Delta$ HR, change-from-baseline heart rate; BHV-3500, zavegepant; bpm, beats per minute; CI, confidence interval; LS, least squares; QTc, corrected QT interval; SAD, single-ascending dose.

**B. LS mean  $\Delta$ HR across time points on Day 1 (MAD study QT/QTc analysis population)**

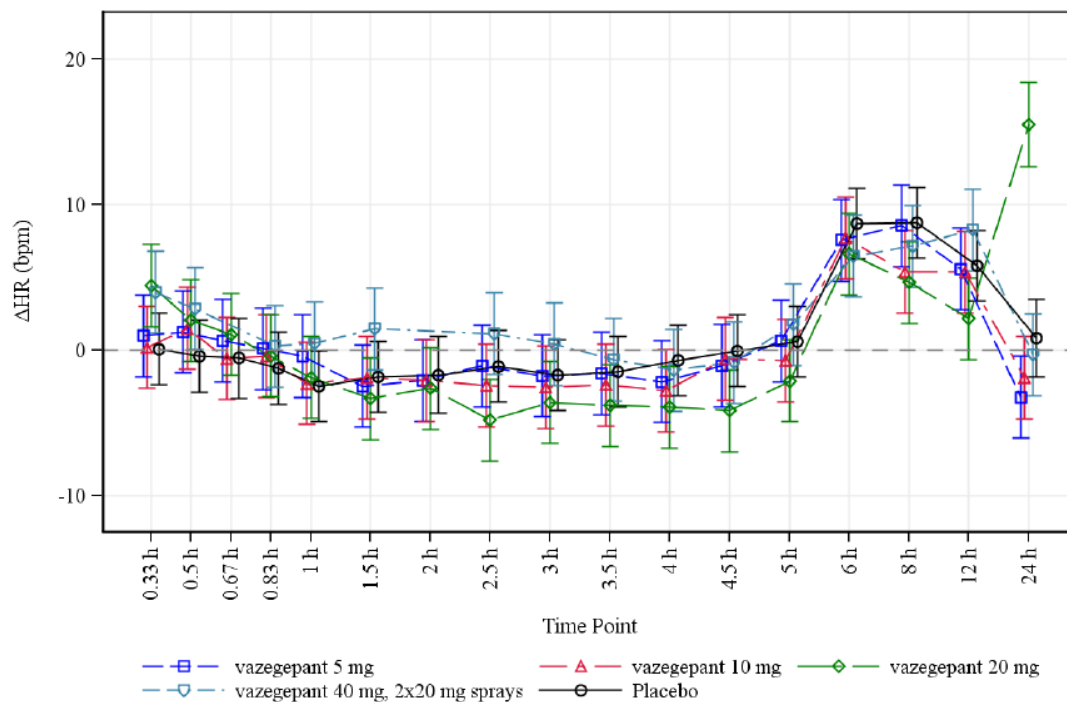

Notes: LS mean and 90% CI based on a linear mixed-effects model.

$\Delta$ HR = Time+Treatment+Time\*Treatment+Baseline HR. A compound symmetry covariance structure was used to specify the repeated measures (time within subject).

$\Delta$ HR, change-from-baseline heart rate; CI, confidence interval; LS, least squares; MAD, multiple-ascending dose; QTc, corrected QT interval; vazegepant, vazegepant.

**C. LS mean  $\Delta$ HR across time points on Day 8 (MAD study QT/QTc analysis population)**

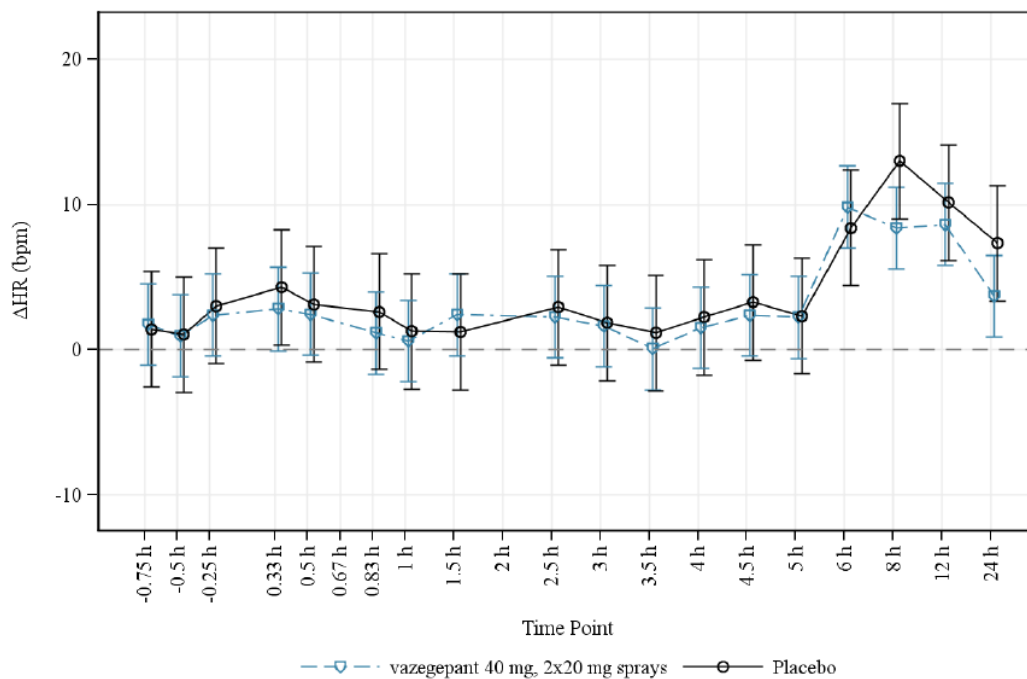

Notes: LS mean and 90% CI based on a linear mixed-effects model.

$\Delta$ HR = Time+Treatment+Time\**Treatment*+Baseline HR. A compound symmetry covariance structure was used to specify the repeated measures (time within subject).

$\Delta$ HR, change-from-baseline heart rate; CI, confidence interval, LS, least squares; MAD, multiple-ascending dose; QTc, corrected QT interval; vazegepant, zavegepant.

**D. LS mean  $\Delta$ HR across time points on Day 8 (MAD study QT/QTc analysis population)**

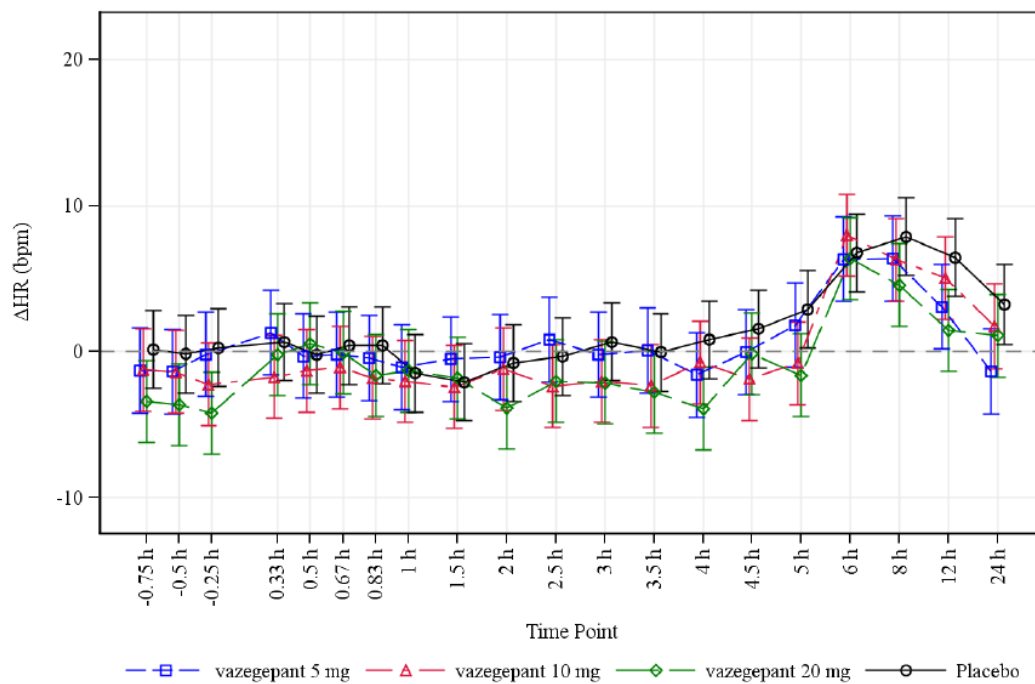

Notes: LS mean and 90% CI based on a linear mixed-effects model.  
 $\Delta$ HR = Time+Treatment+Time\*Treatment+Baseline HR. A compound symmetry covariance structure was used to specify the repeated measures (time within subject).  
 $\Delta$ HR, change-from-baseline heart rate; CI, confidence interval; LS, least squares; MAD, multiple-ascending dose; QTc, corrected QT interval; vazegepant, zavegepant.

**Figure S2.** Scatter plots of QTcF and RR by treatment (QT/QTc population)

**A. SAD study**

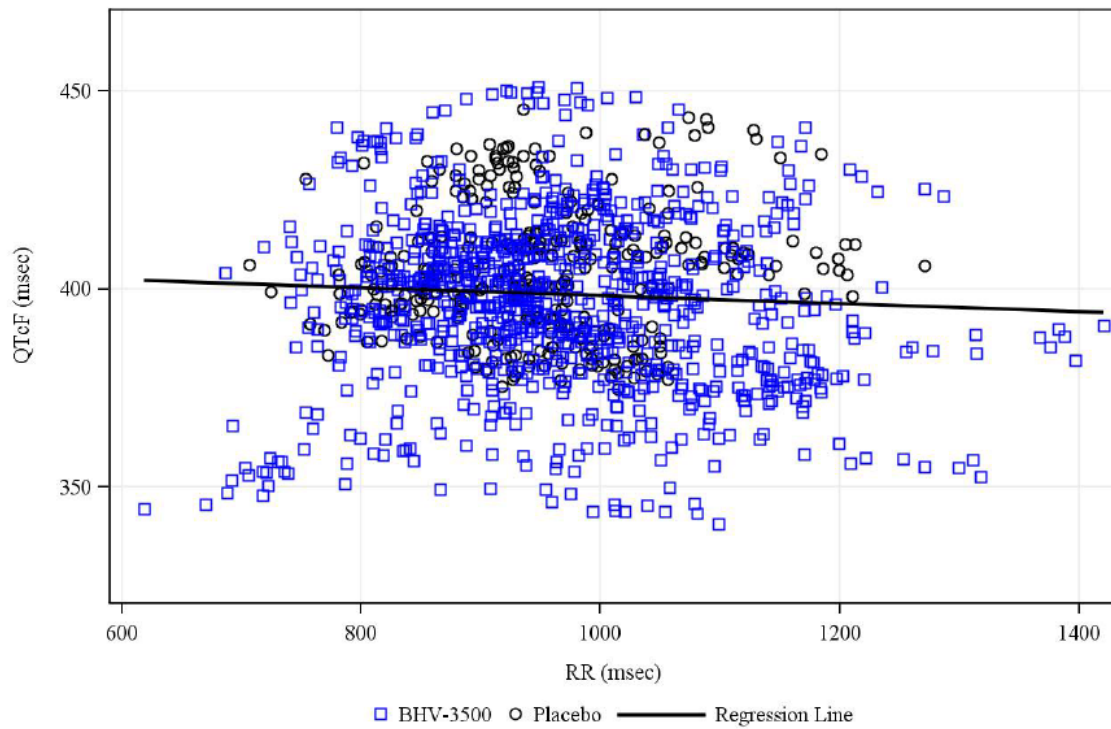

Notes: The solid black line denotes the simple linear regression line across all pairs of (RR, QTcF) based on the equation  $QTcF = 408.27 + -0.010 \cdot RR$   
BHV-3500, zavegepant; QTc, corrected QT interval; QTcF, QT interval Fridericia's correction; SAD, single-ascending dose.



**B. MAD study**

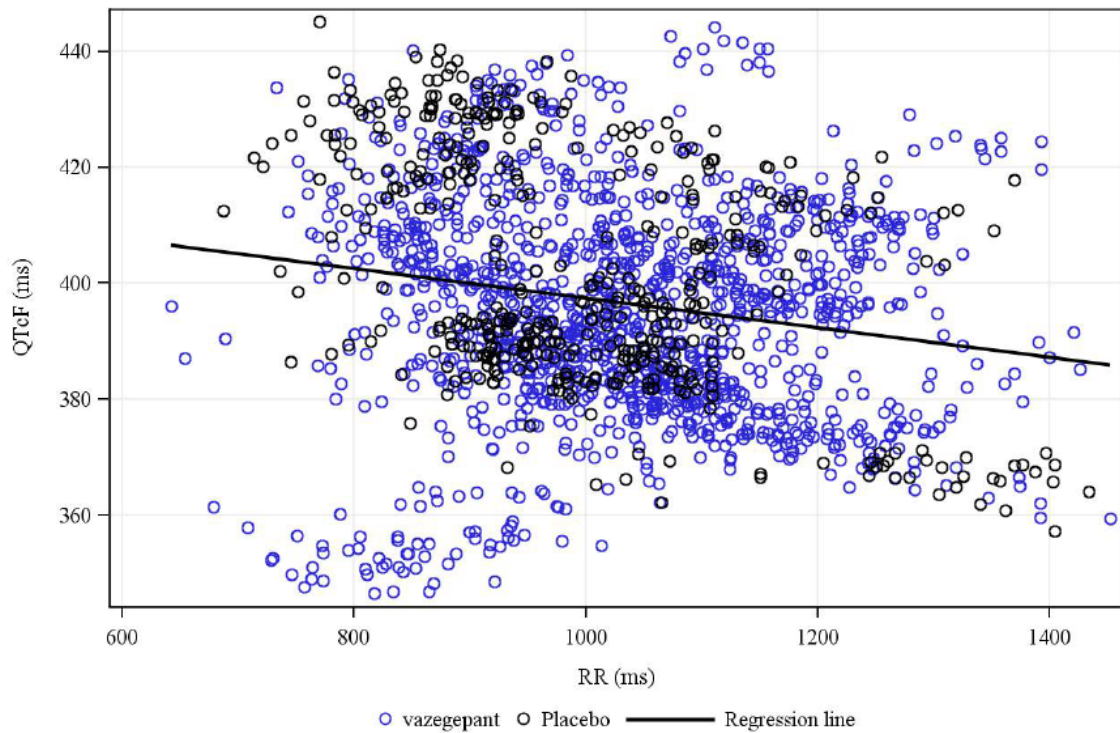

Notes: The solid black line denotes the simple linear regression line across all pairs of (RR, QTcF) based on the equation  $QTcF=422.89 + -0.026*RR$  with a  $P$  value of  $<0.0001$  for the slope. BHV-3500, vazegepant; MAD, multiple-ascending dose; QTc, corrected QT interval; QTcF, QT interval Fridericia's correction.

**Figure S3.**  $\Delta\Delta$ QT joint plots stratified by dose (SAD Study: QT/QTc analysis population, PK/QTc analysis population)

**A. Joint plot of zavegepant plasma concentrations and  $\Delta\Delta$ QTcF over time (0.1 mg)**

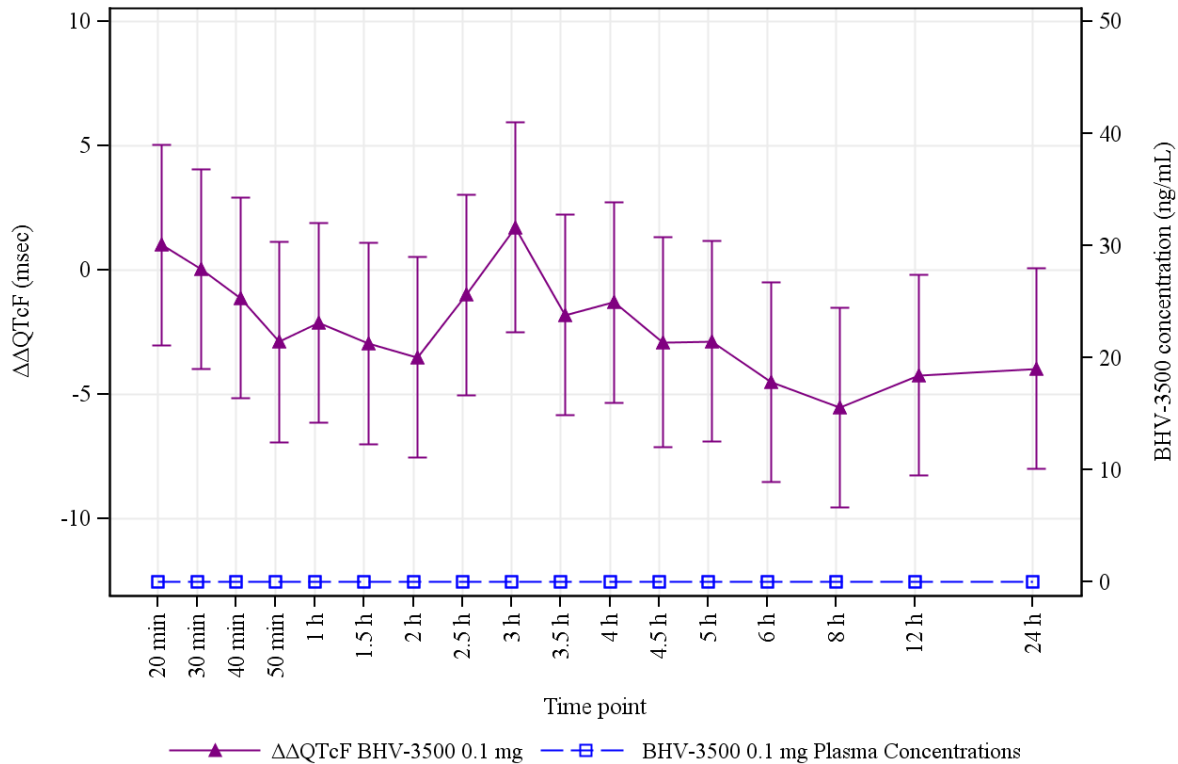

Notes: Error bars for  $\Delta\Delta$ QTcF are 90% CI from by-time point statistical modeling while the errors bars for concentration are 90% CI from descriptive statistics. A lower bound for concentration less than 0 was not biologically plausible and was therefore substituted as 0.  $\Delta\Delta$ QT, ; placebo-corrected change-from-baseline in QT interval;  $\Delta\Delta$ QTcF, placebo-adjusted change-from-baseline QT interval Fridericia's correction; BHV-3500, zavegepant; CI, confidence interval; PK, pharmacokinetics; QTc, corrected QT interval; SAD, single-ascending dose.

**B. Joint plot of zavegepant plasma concentrations and  $\Delta\Delta\text{QTcF}$  over time (0.3 mg)**

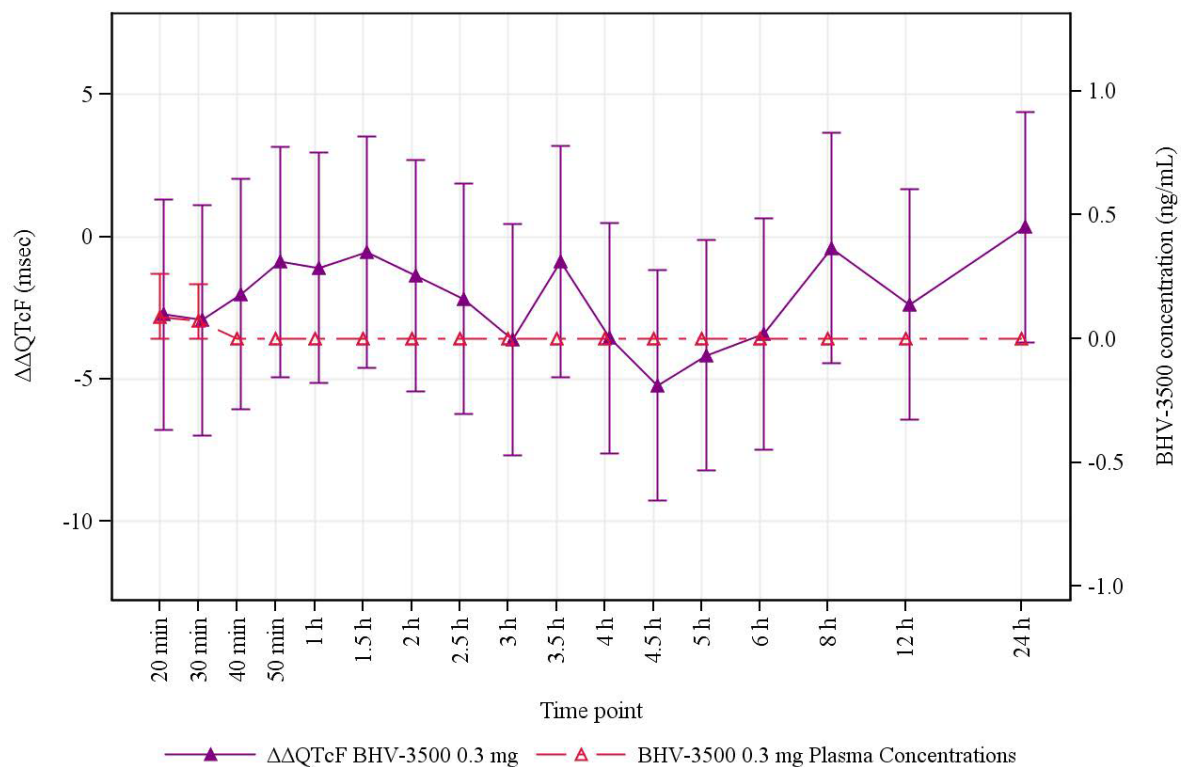

Notes: Error bars for  $\Delta\Delta\text{QTcF}$  are 90% CI from by-time point statistical modeling while the errors bars for concentration are 90% CI from descriptive statistics. A lower bound for concentration less than 0 was not biologically plausible and was therefore substituted as 0.

$\Delta\Delta\text{QTcF}$ , placebo-adjusted change-from-baseline QT interval Fridericia's correction; BHV-3500, zavegepant; CI, confidence, interval.

**C. Joint plot of zavegepant plasma concentrations and  $\Delta\Delta\text{QTcF}$  over time (1 mg)**

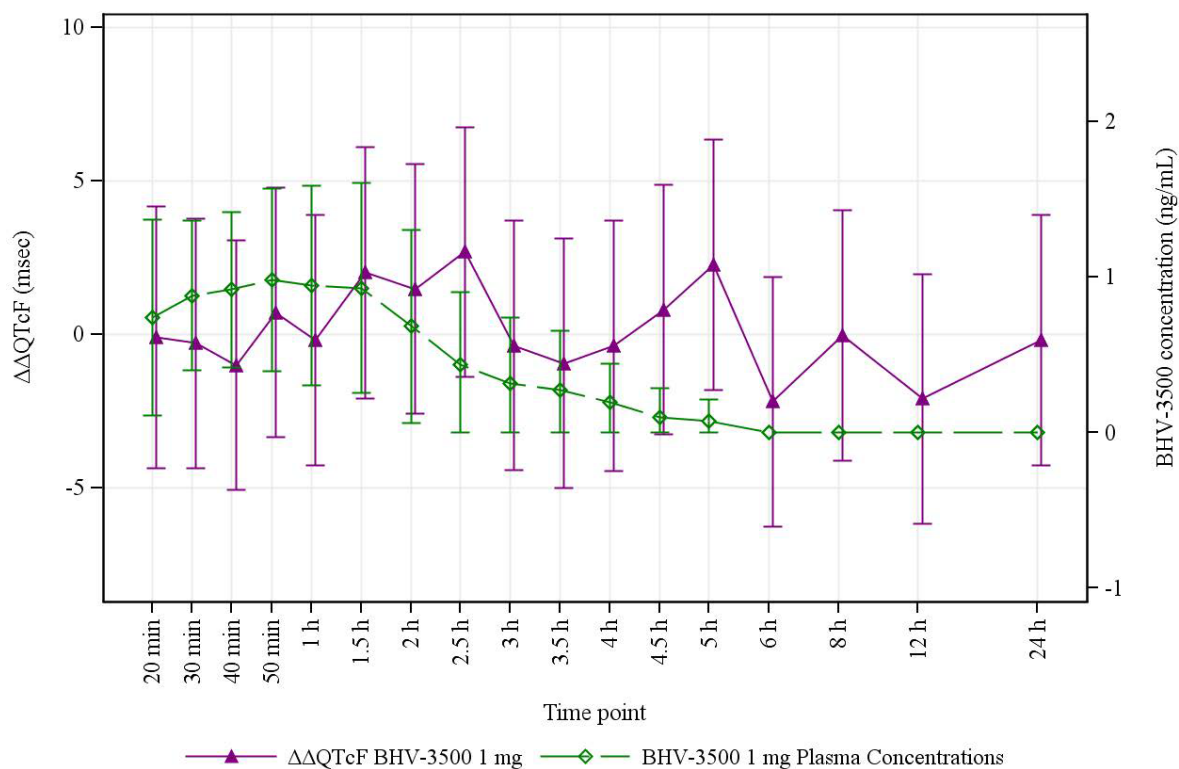

Notes: Error bars for  $\Delta\Delta\text{QTcF}$  are 90% CI from by-time point statistical modeling while the error bars for concentration are 90% CI from descriptive statistics. A lower bound for concentration less than 0 was not biologically plausible and was therefore substituted as 0.  $\Delta\Delta\text{QTcF}$ , placebo-adjusted change-from-baseline QT interval Fridericia's correction; BHV-3500, zavegepant; CI, confidence interval.

**D. Joint plot of zavegepant plasma concentrations and  $\Delta\Delta QTcF$  over time (3 mg)**

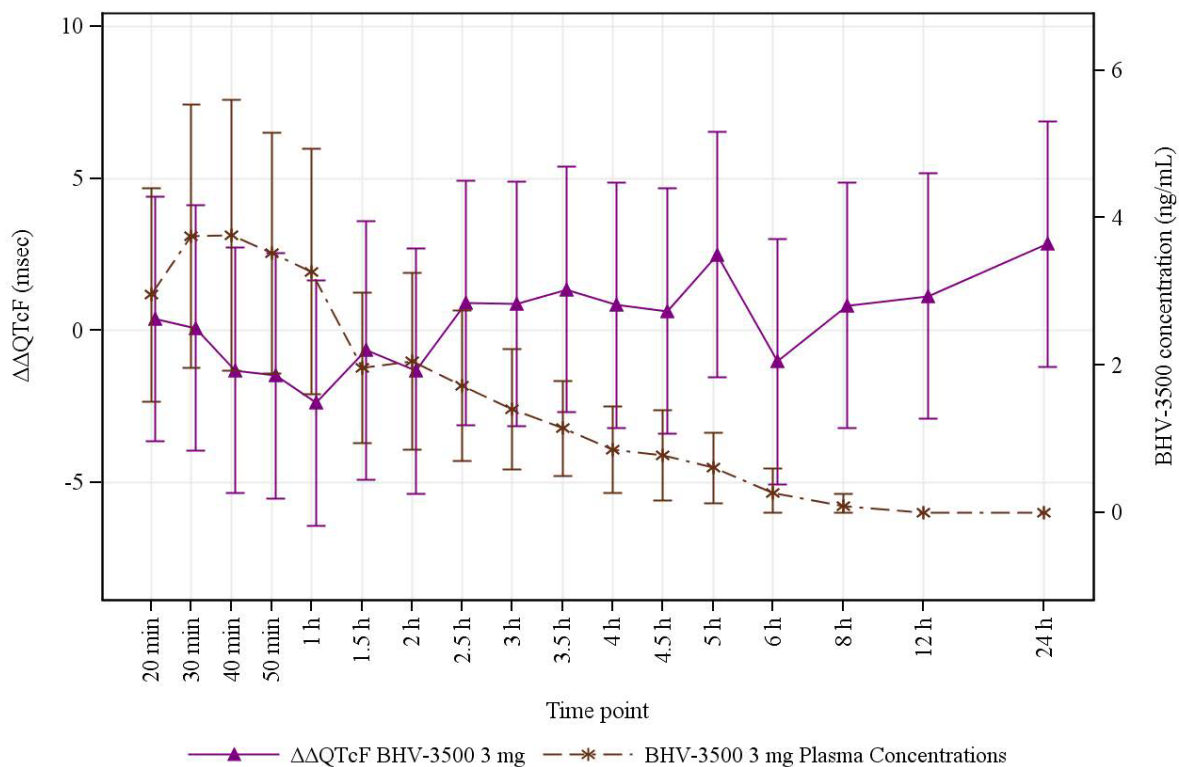

Notes: Error bars for  $\Delta\Delta QTcF$  are 90% CI from by-time point statistical modeling while the errors bars for concentration are 90% CI from descriptive statistics. A lower bound for concentration less than 0 was not biologically plausible and was therefore substituted as 0.

$\Delta\Delta QTcF$ , placebo-adjusted change-from-baseline QT interval Fridericia's correction; BHV-3500, zavegepant; CI, confidence interval.

**E. Joint plot of zavegepant plasma concentrations and  $\Delta\Delta\text{QTcF}$  over time (5 mg)**

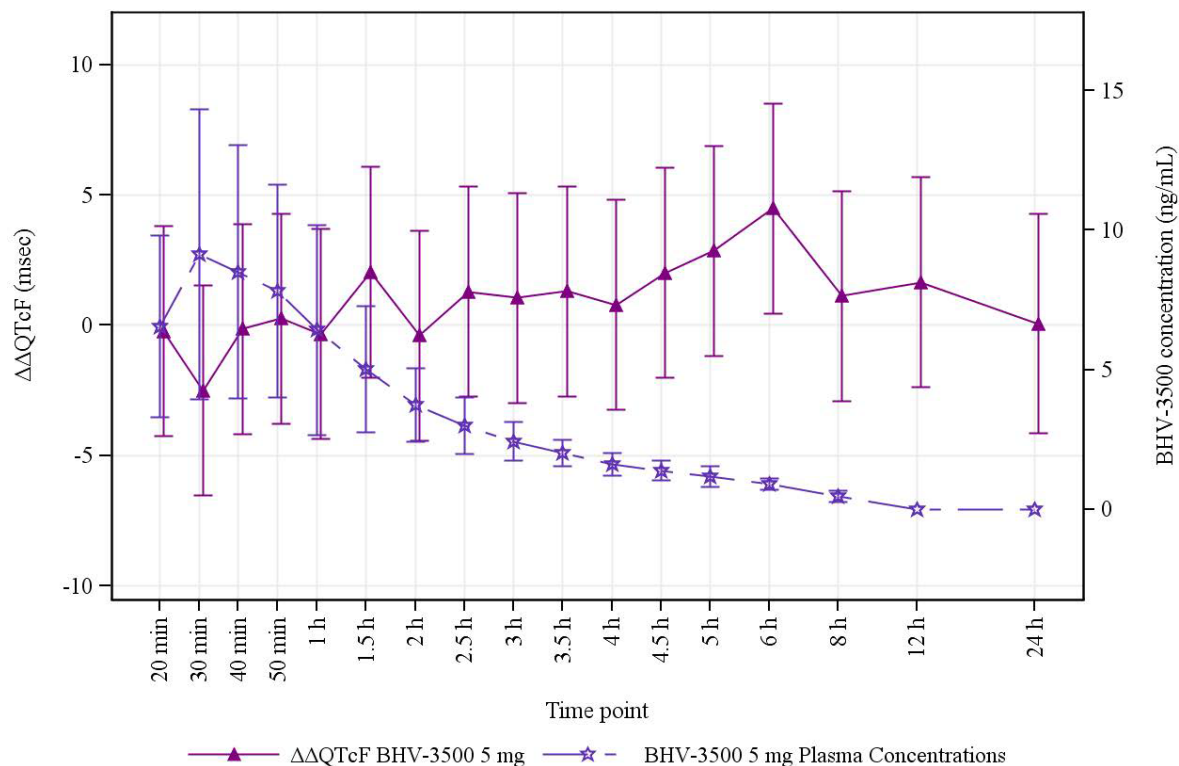

Notes: Error bars for  $\Delta\Delta\text{QTcF}$  are 90% CI from by-time point statistical modeling while the errors bars for concentration are 90% CI from descriptive statistics. A lower bound for concentration less than 0 was not biologically plausible and was therefore substituted as 0.  $\Delta\Delta\text{QTcF}$ , placebo-adjusted change-from-baseline QT interval Fridericia's correction; BHV-3500, zavegepant; CI, confidence interval.

**F. Joint plot of zavegepant plasma concentrations and  $\Delta\Delta\text{QTcF}$  over time (10 mg)**

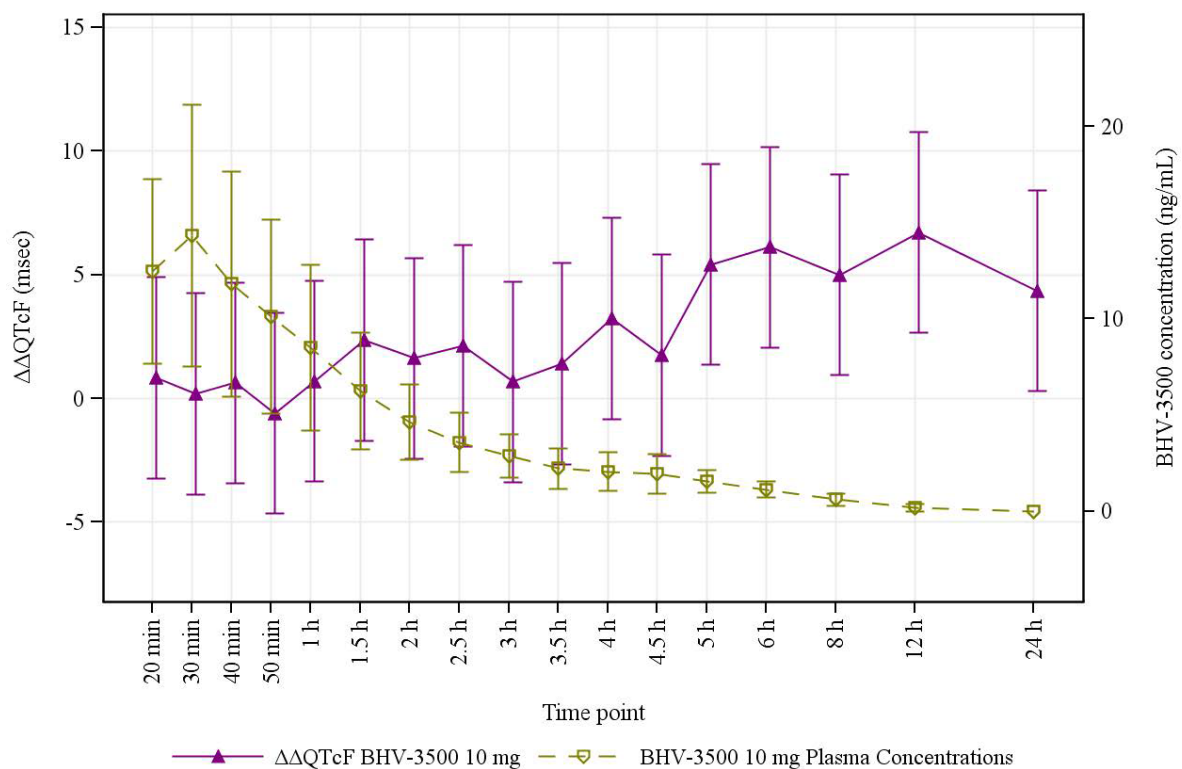

Notes: Error bars for  $\Delta\Delta\text{QTcF}$  are 90% CI from by-time point statistical modeling while the errors bars for concentration are 90% CI from descriptive statistics. A lower bound for concentration less than 0 was not biologically plausible and was therefore substituted as 0.

$\Delta\Delta\text{QTcF}$ , placebo-adjusted change-from-baseline QT interval Fridericia's correction; BHV-3500, zavegepant; CI, confidence interval.

**G. Joint plot of zavegepant plasma concentrations and  $\Delta\Delta\text{QTcF}$  over time (20 mg)**

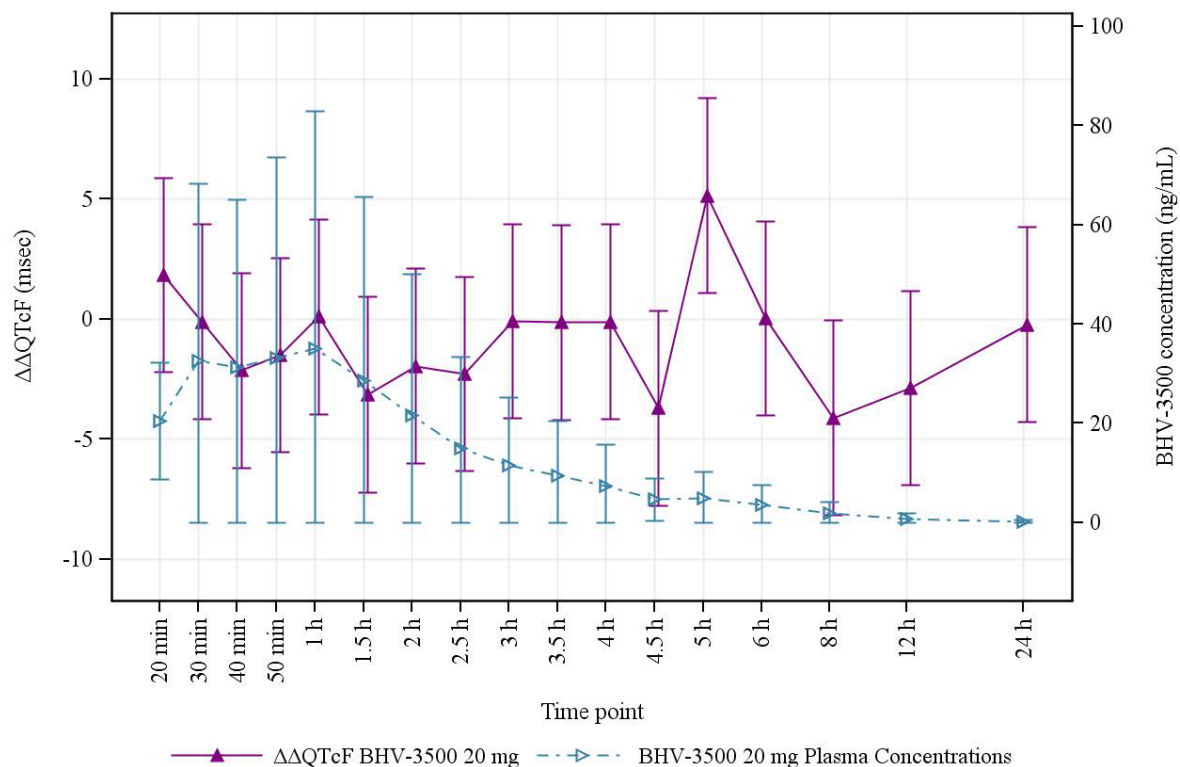

Notes: Error bars for  $\Delta\Delta\text{QTcF}$  are 90% CI from by-time point statistical modeling while the errors bars for concentration are 90% CI from descriptive statistics. A lower bound for concentration less than 0 was not biologically plausible and was therefore substituted as 0.  $\Delta\Delta\text{QTcF}$ , placebo-adjusted change-from-baseline QT interval Fridericia's correction; BHV-3500, zavegepant; CI, confidence interval.



**H. Joint plot of zavegepant plasma concentrations and  $\Delta\Delta QTcF$  over time (20 mg, 2x10 mg sprays)**

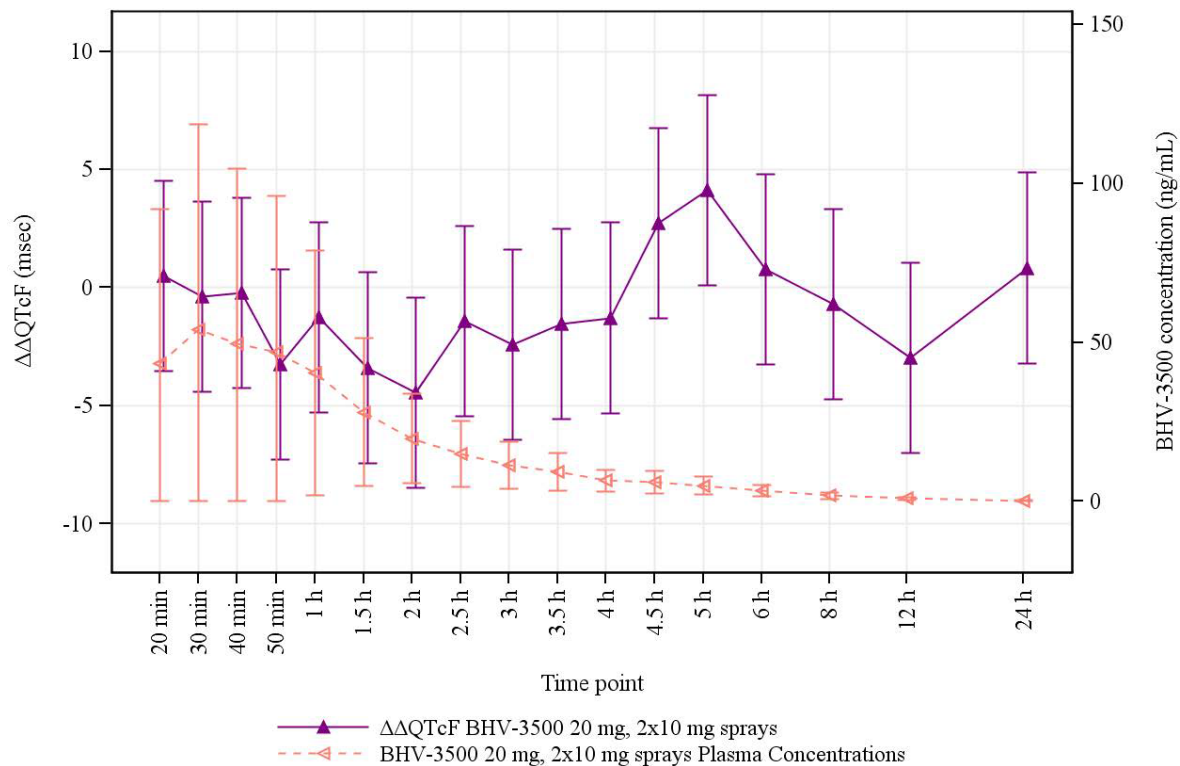

Notes: Error bars for  $\Delta\Delta QTcF$  are 90% CI from by-time point statistical modeling while the errors bars for concentration are 90% CI from descriptive statistics. A lower bound for concentration less than 0 was not biologically plausible and was therefore substituted as 0.  $\Delta\Delta QTcF$ , placebo-adjusted change-from-baseline QT interval Fridericia's correction; BHV-3500, zavegepant; CI, confidence interval.

**I. Joint plot of zavegepant plasma concentrations and  $\Delta\Delta\text{QTcF}$  over time (40 mg, 2x20 mg sprays)**

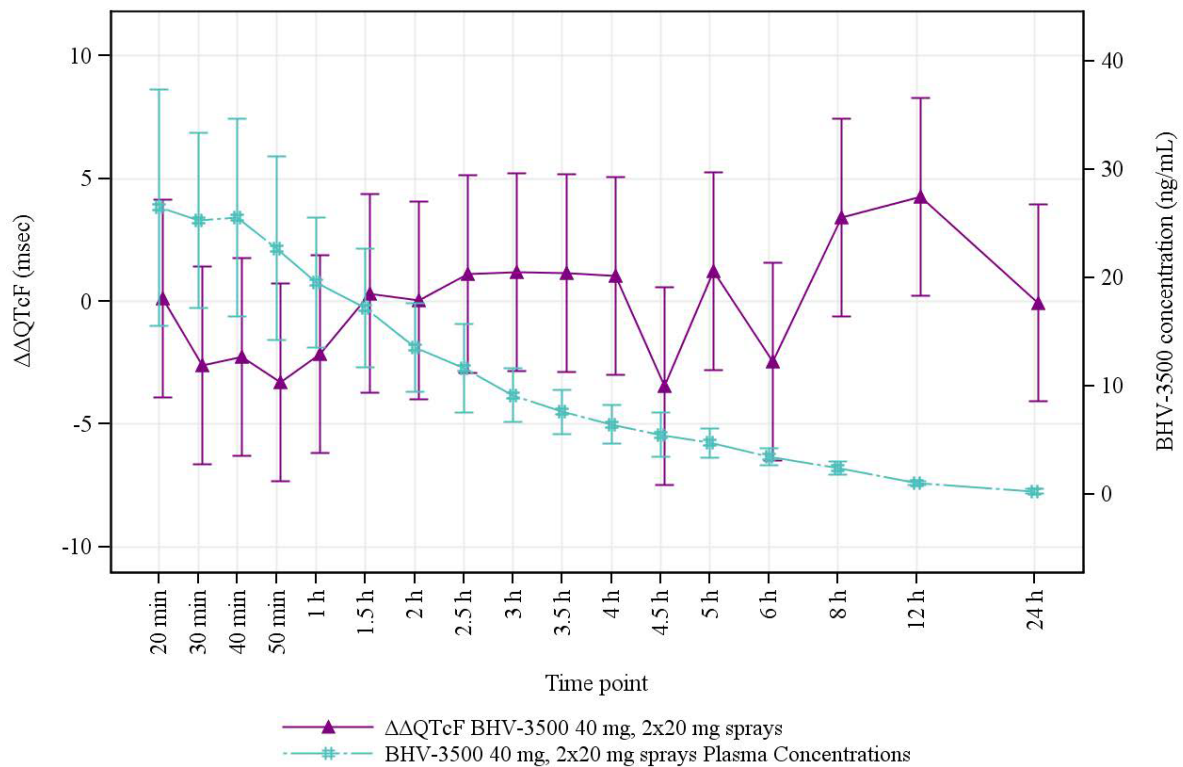

Notes: Error bars for  $\Delta\Delta\text{QTcF}$  are 90% CI from by-time point statistical modeling while the errors bars for concentration are 90% CI from descriptive statistics. A lower bound for concentration less than 0 was not biologically plausible and was therefore substituted as 0.  $\Delta\Delta\text{QTcF}$ , placebo-adjusted change-from-baseline QT interval Fridericia's correction; BHV-3500, zavegepant; CI, confidence interval.

**Figure S4.**  $\Delta\Delta QT$  joint plots stratified by dose (MAD Study: QT/QTc analysis population, PK/QTc analysis population)

**A. Joint plot of vazegepant plasma concentrations and  $\Delta\Delta QTcF$  over time (5 mg QD)**

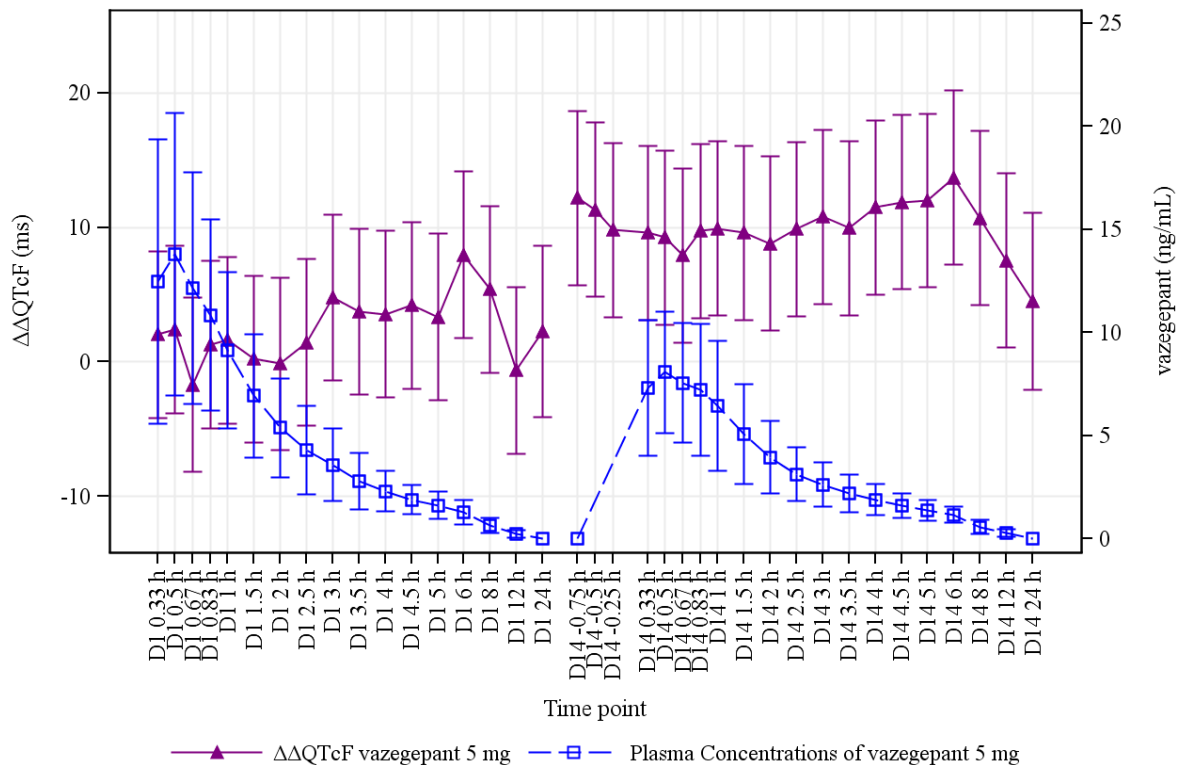

Notes: Error bars for  $\Delta\Delta QTcF$  are 90% CI from by-time point statistical modeling while the errors bars for concentration are 90% CI from descriptive statistics.

$\Delta\Delta QT$ , placebo-corrected change-from-baseline in QT interval;  $\Delta\Delta QTcF$ , placebo-adjusted change-from-baseline QT interval Fridericia's correction; CI, confidence interval; D, Day; MAD, multiple-ascending dose; PK, pharmacokinetics; QTc, corrected QT interval; QD, once per day; vazegepant, vazegepant.

**B. Joint plot of zavegepant plasma concentrations and  $\Delta\Delta\text{QTcF}$  over time (10 mg QD)**

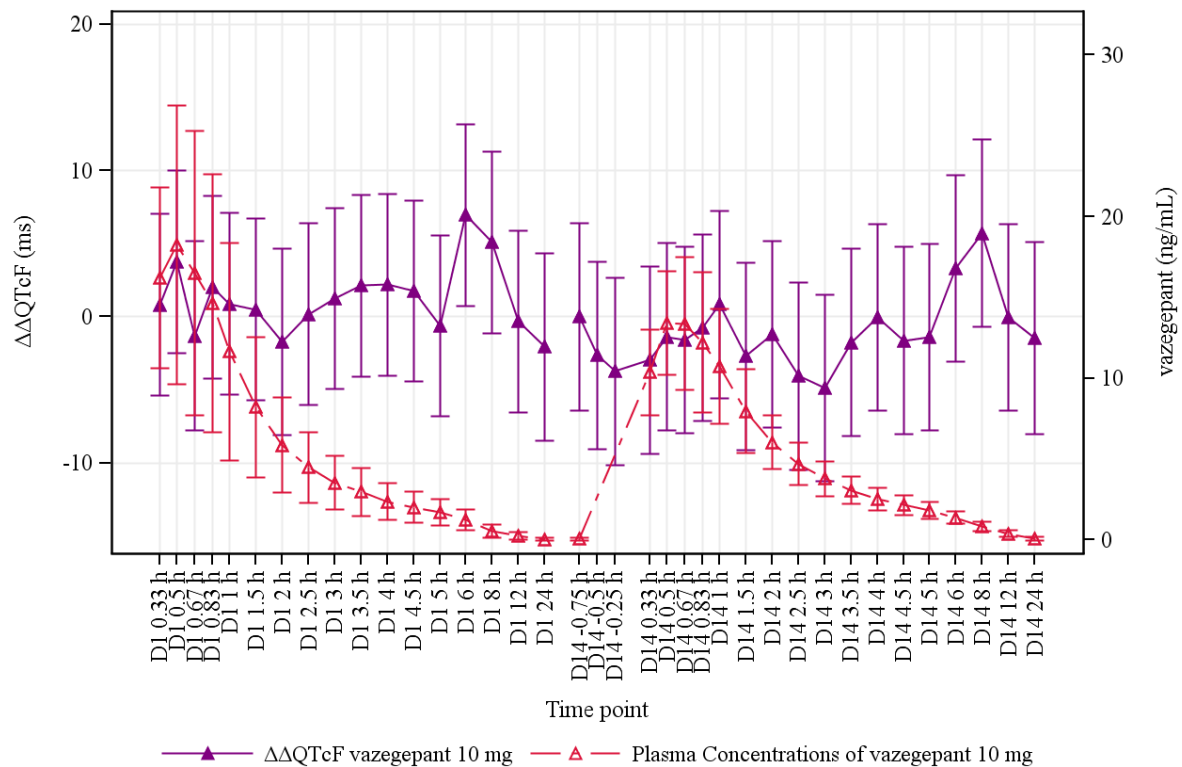

Notes: Error bars for  $\Delta\Delta\text{QTcF}$  are 90% CI from by-time point statistical modeling while the errors bars for concentration are 90% CI from descriptive statistics.  $\Delta\Delta\text{QTcF}$ , placebo-adjusted change-from-baseline QT interval Fridericia's correction; CI, confidence interval; D, Day; QD, once per day; zavegepant, zavegepant.

**C. Joint plot of zavegepant plasma concentrations and  $\Delta\Delta\text{QTcF}$  over time (20 mg QD)**

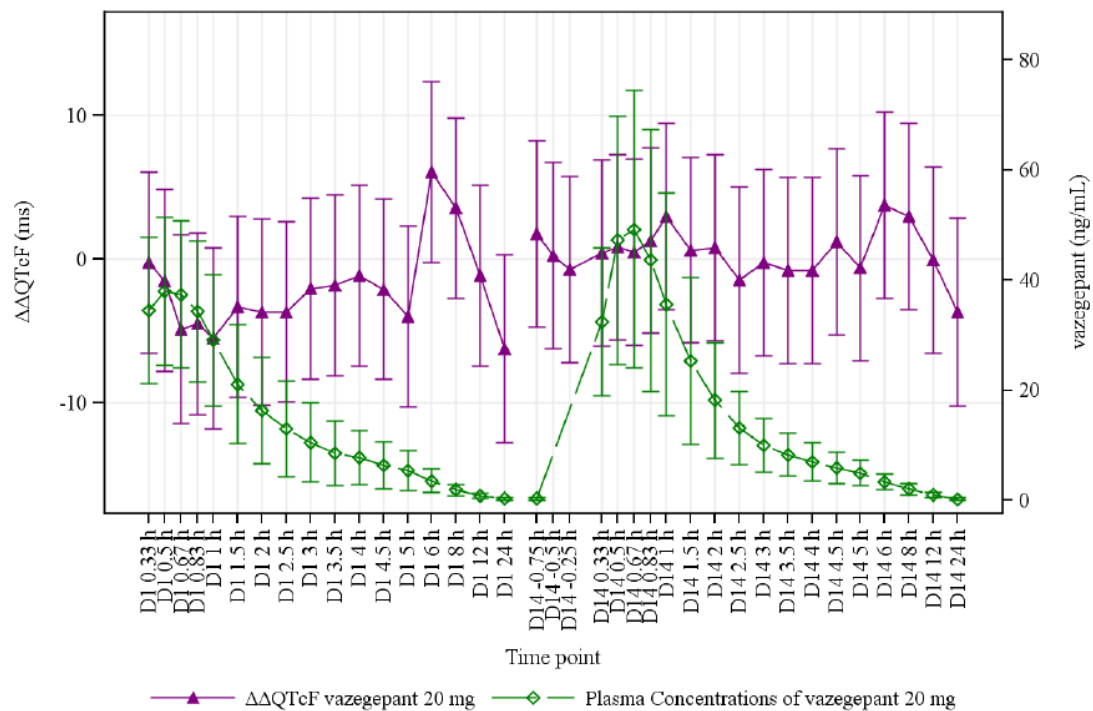

Notes: Error bars for  $\Delta\Delta\text{QTcF}$  are 90% CI from by-time point statistical modeling while the errors bars for concentration are 90% CI from descriptive statistics.  $\Delta\Delta\text{QTcF}$ , placebo-adjusted change-from-baseline QT interval Fridericia's correction; CI, confidence interval; D, Day; QD, once per day; zavegepant, zavegepant.

**D. Joint plot of zavegepant plasma concentrations and  $\Delta\Delta\text{QTcF}$  over time (40 mg, 2x20 mg sprays QD)**

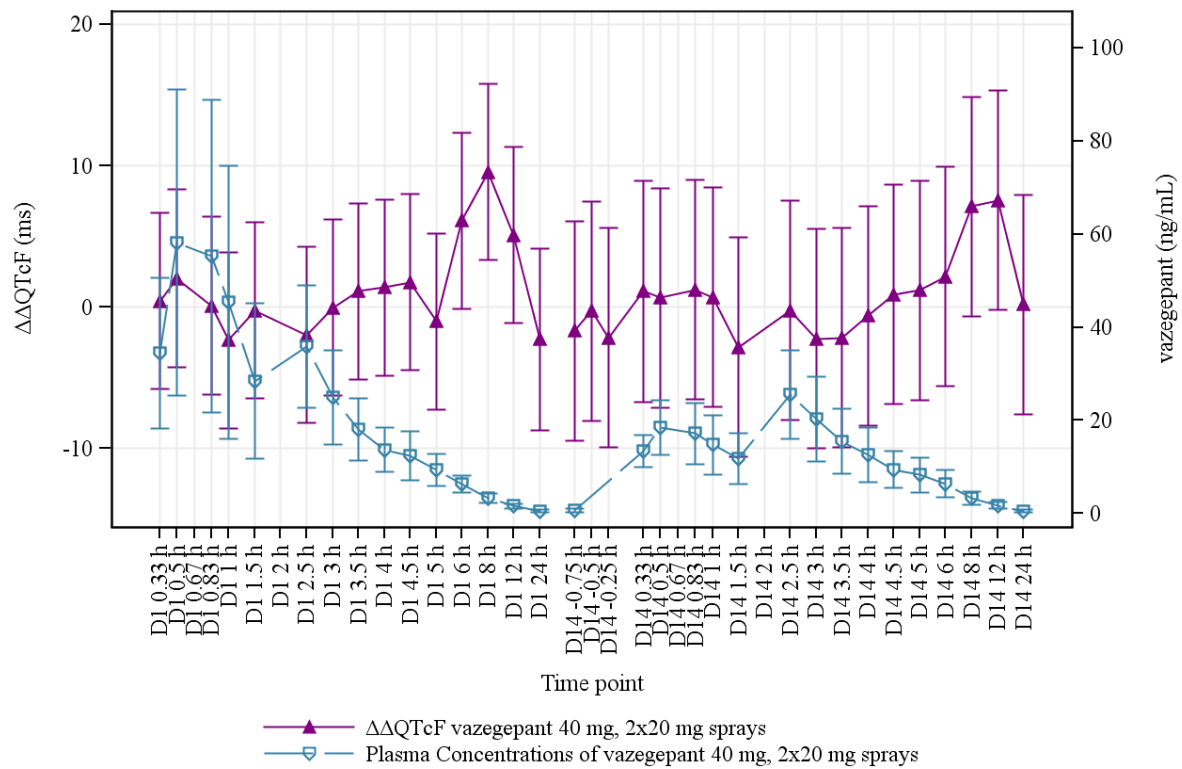

Notes: Error bars for  $\Delta\Delta\text{QTcF}$  are 90% CI from by-time point statistical modeling while the errors bars for concentration are 90% CI from descriptive statistics.  $\Delta\Delta\text{QTcF}$ , placebo-adjusted change-from-baseline QT interval Fridericia's correction; CI, confidence interval; D, Day; QD, once per day; zavegepant, zavegepant.

**Figure S5.** Scatter plot of observed zavegepant plasma concentrations and observed  $\Delta$ QTcF (SAD study, PK/QTc analysis population)

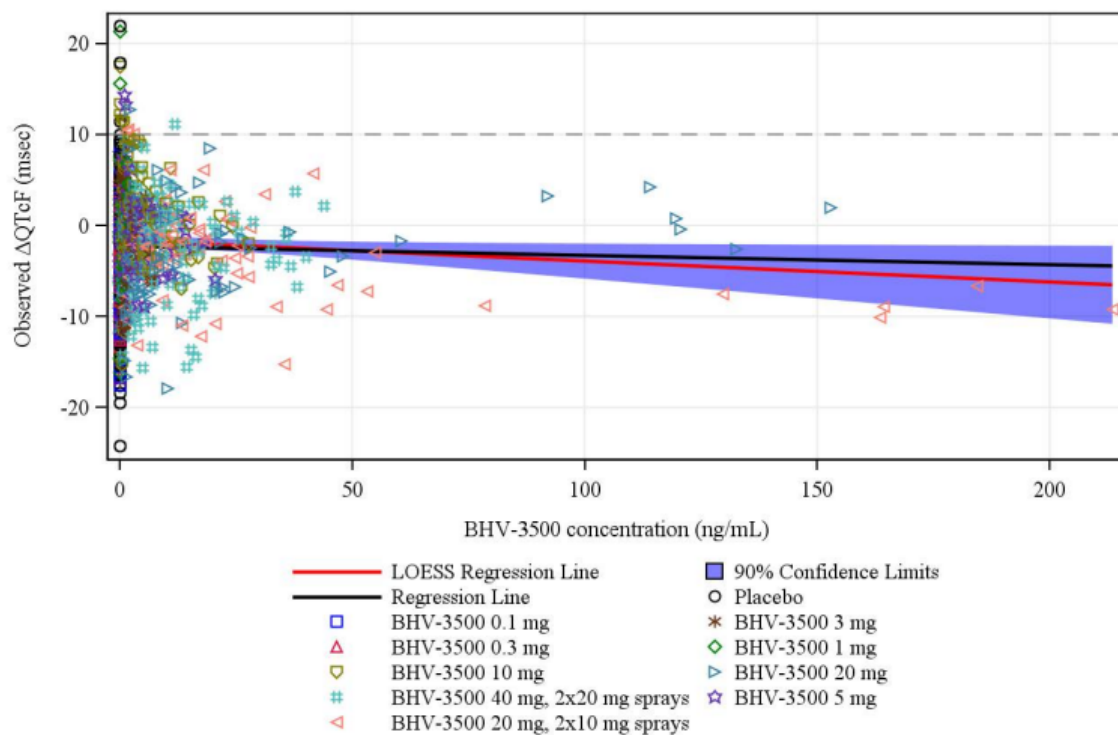

Notes: The red line with the blue shaded area denotes the LOESS regression line and 90% confidence limits. The black solid line denotes the simple linear regression line.

$\Delta$ QTcF, change from baseline QTcF; BHV-3500, zavegepant; LOESS, locally weighted scatter plot smoothing; PK, pharmacokinetics; QTc, corrected QT interval; SAD, single-ascending dose.

**Figure S6.** Scatter plot of observed zavegepant plasma concentrations and observed  $\Delta$ QTcF (MAD study, PK/QTc analysis population)

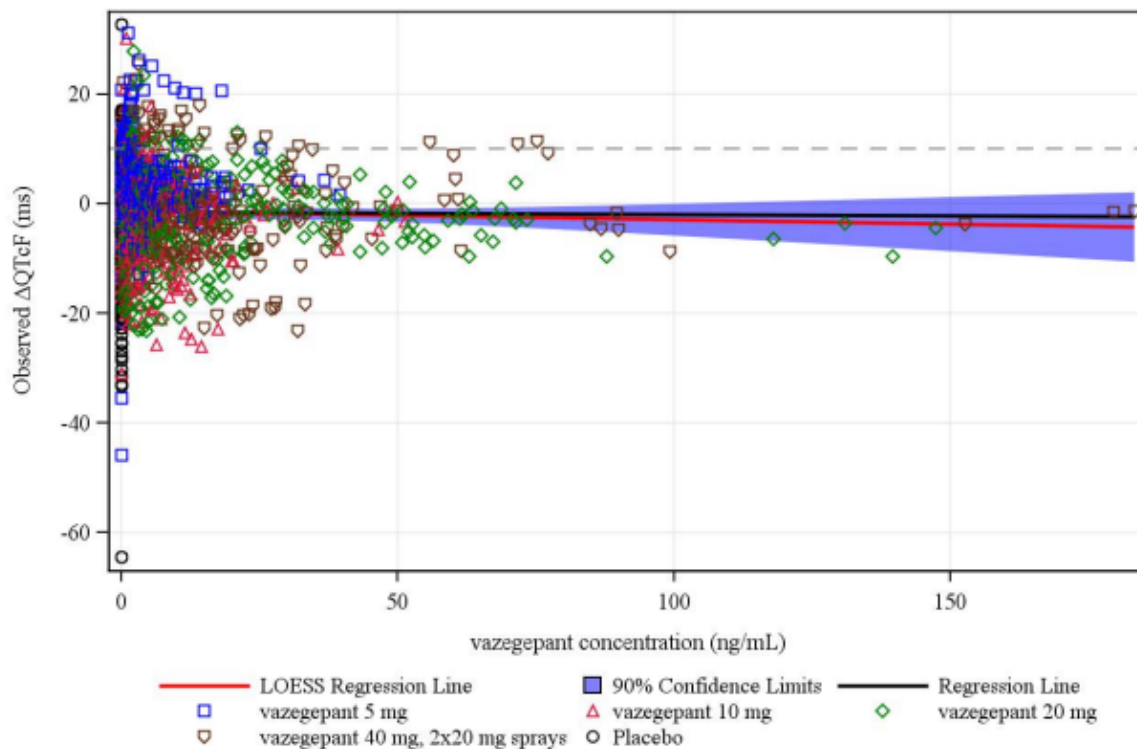

Notes: The red line with the blue shaded area denotes the LOESS regression line and 90% confidence limits. The black solid line denotes the simple linear regression line.

$\Delta$ QTcF, baseline QTcF; LOESS, locally weighted scatter plot smoothing; MAD, multiple-ascending dose; PK, pharmacokinetics; QTc, corrected QT interval; zavegepant, zavegepant.



**Figure S7.** Concentration time plots by dose and study

**A. Mean  $\pm$ SD zavegepant plasma concentration: SAD study**

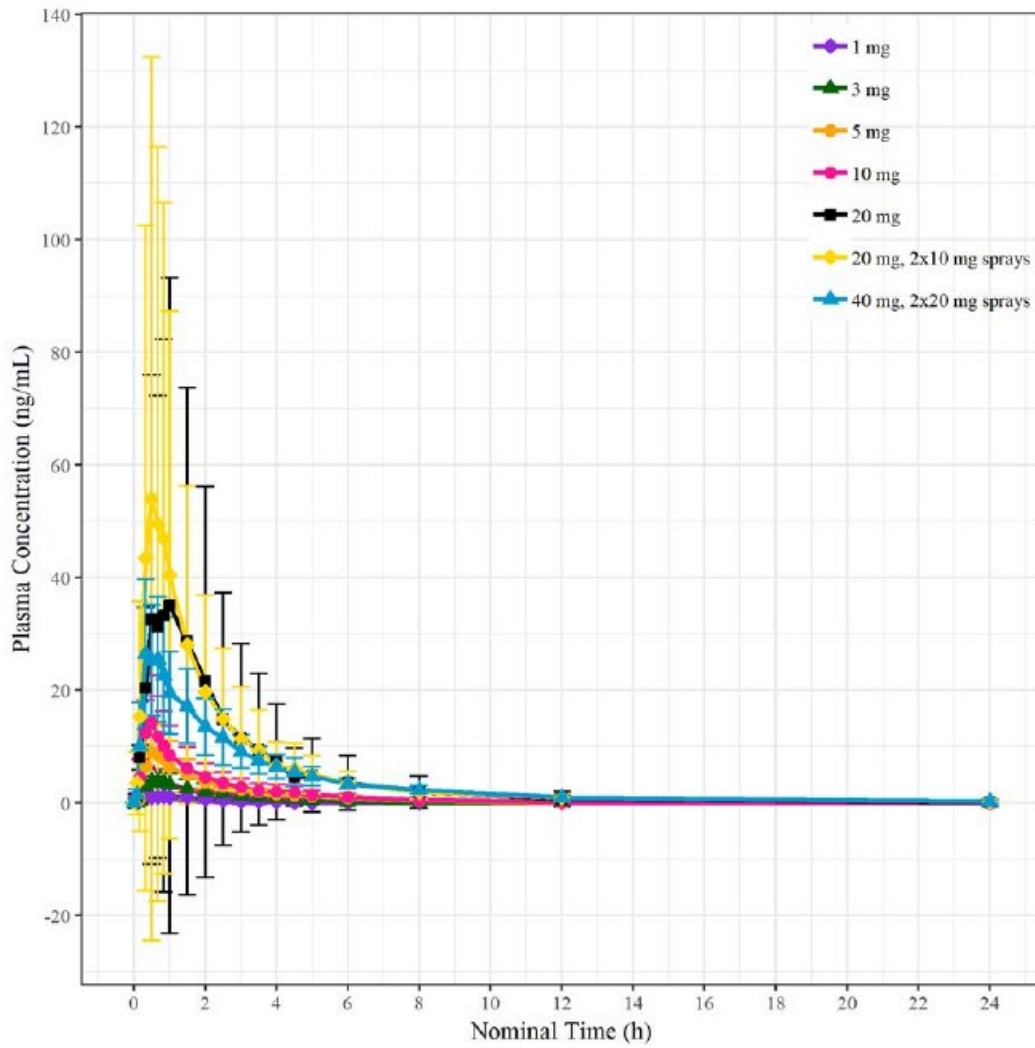

SAD, single-ascending dose; SD, standard deviation.

**B. Mean  $\pm$ SE zavegepant plasma concentration: MAD study Day 1**

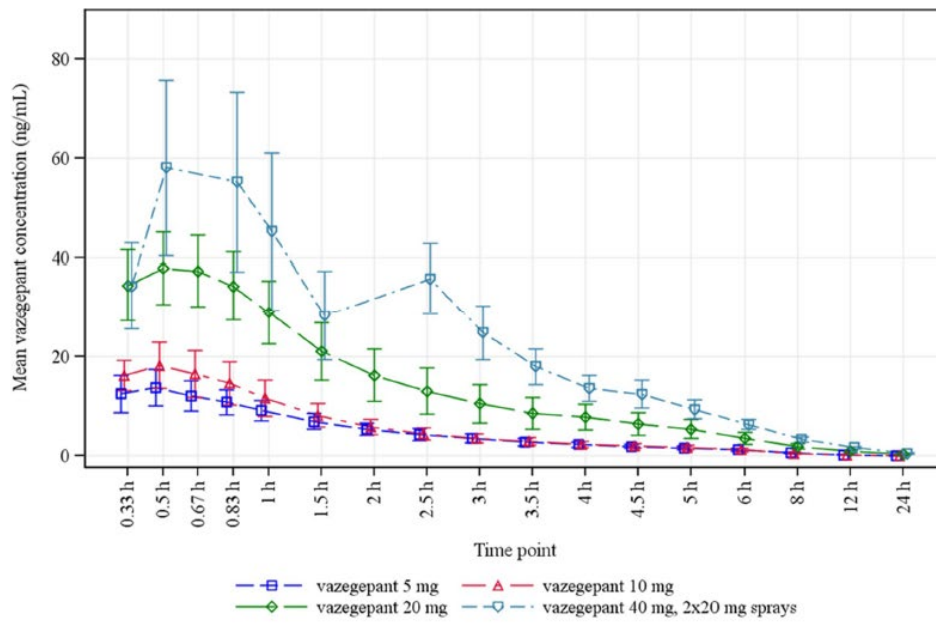

Notes: Figure displays mean and  $\pm$  SE from descriptive statistics. If mean - SD was below 0, 0 was substituted, as concentrations below 0 are not biologically plausible.

MAD, multiple-ascending dose; SD, standard deviation; SE, standard error; vazegepant, zavegepant.

**C. Mean  $\pm$ SE zavegepant plasma concentration: MAD study Day 8**

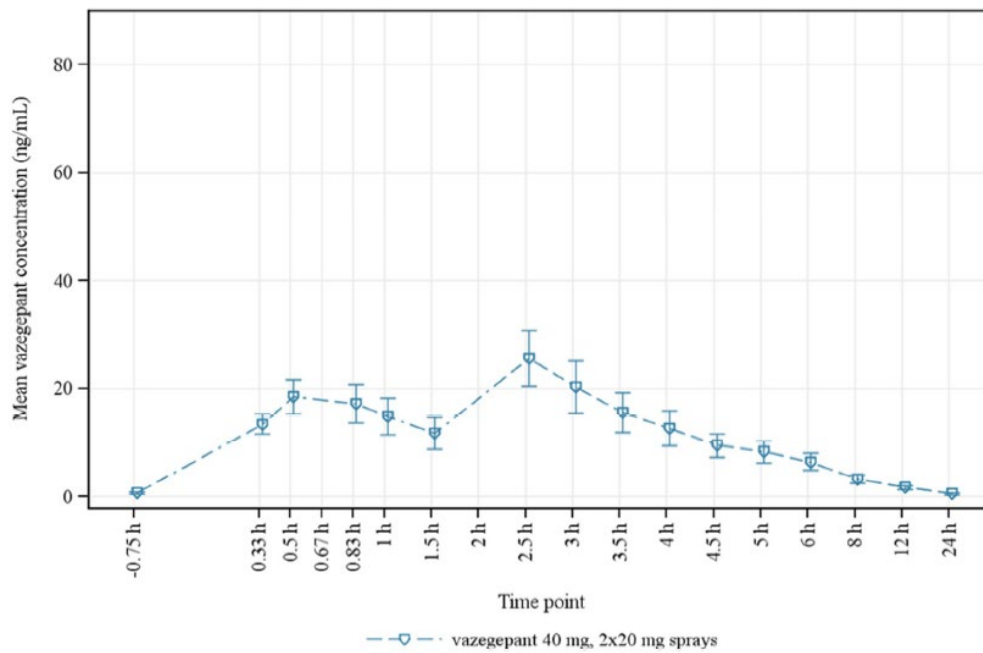

Notes: Figure displays mean and  $\pm$ SE from descriptive statistics. If mean - SD was below 0, 0 was substituted, as concentrations below 0 are not biologically plausible. MAD, multiple-ascending dose; SD, standard deviation; SE, standard error; vazegepant, zavegepant.

**D. Mean  $\pm$ SE zavegepant plasma concentration: MAD study Day 14**

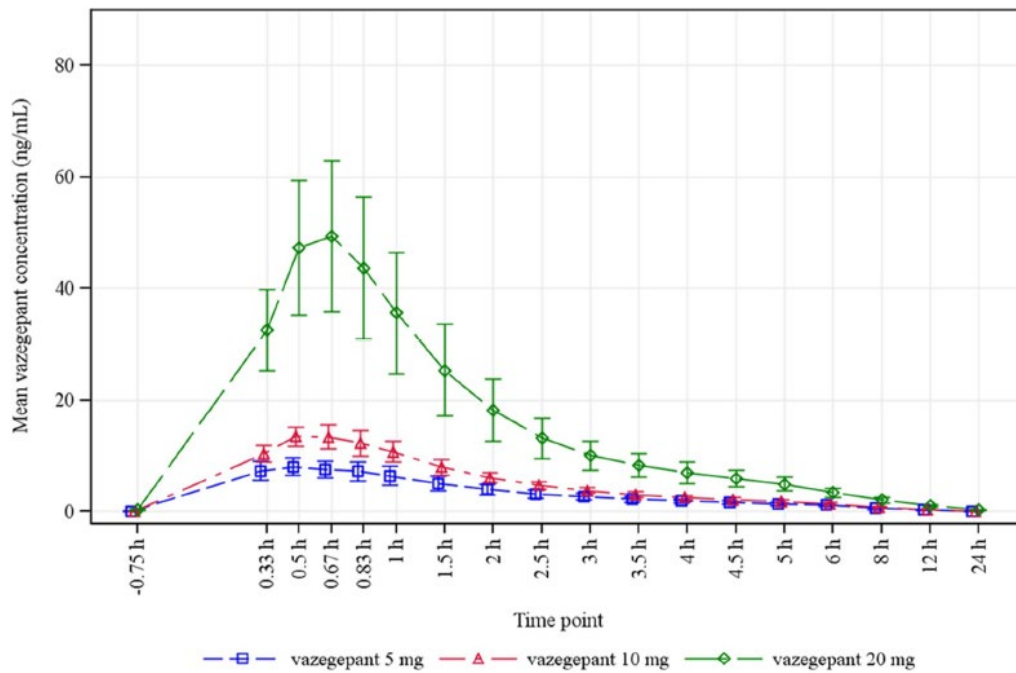

Notes: Figure displays mean and  $\pm$ SE from descriptive statistics. If mean - SD was below 0, 0 was substituted, as concentrations below 0 are not biologically plausible.  
MAD, multiple-ascending dose; SD, standard deviation; SE, standard error; zavegepant, zavegepant.

**Figure S8.** Scatter plot of standardized residuals versus fitted values for zavegepant (SAD and MAD studies pooled) (PK/QTc analysis population)

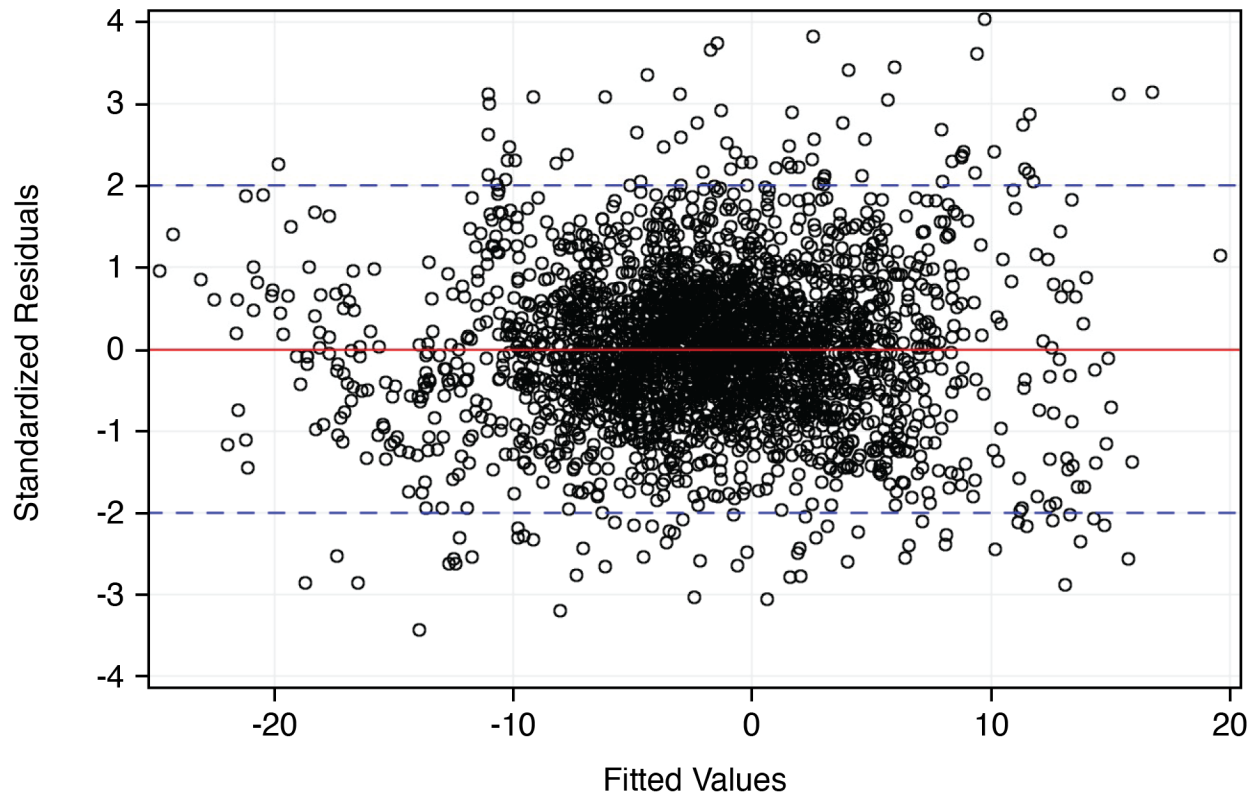

Notes: The blue dashed lines are reference lines at  $\pm 2$  while the red solid line is a reference line at 0. MAD, multiple-ascending dose; PK, pharmacokinetics; QTc, corrected QT interval; SAD, single-ascending dose.

**Figure S9.** Boxplot of standardized residuals versus study (SAD and MAD studies pooled) (PK/QTc analysis population)

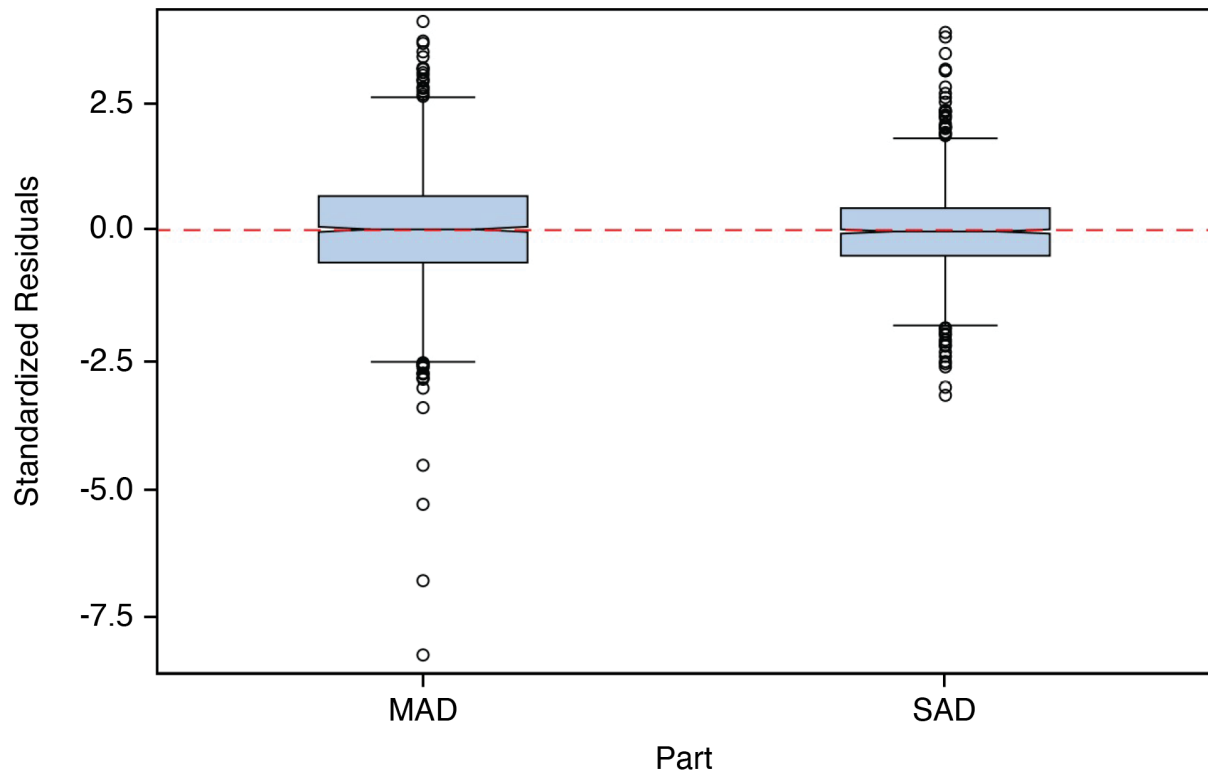

Notes: Notches calculated as  $\text{median} \pm (1.58 \times \text{Interquartile range})/\sqrt{n}$ .

MAD, multiple-ascending dose; PK, pharmacokinetics; QTc, corrected QT interval; SAD, single-ascending dose.

**Figure S10.** Scatter plot of standardized residuals versus baseline QTc for zavegepant (SAD and MAD pooled data, PK/QTc analysis population)

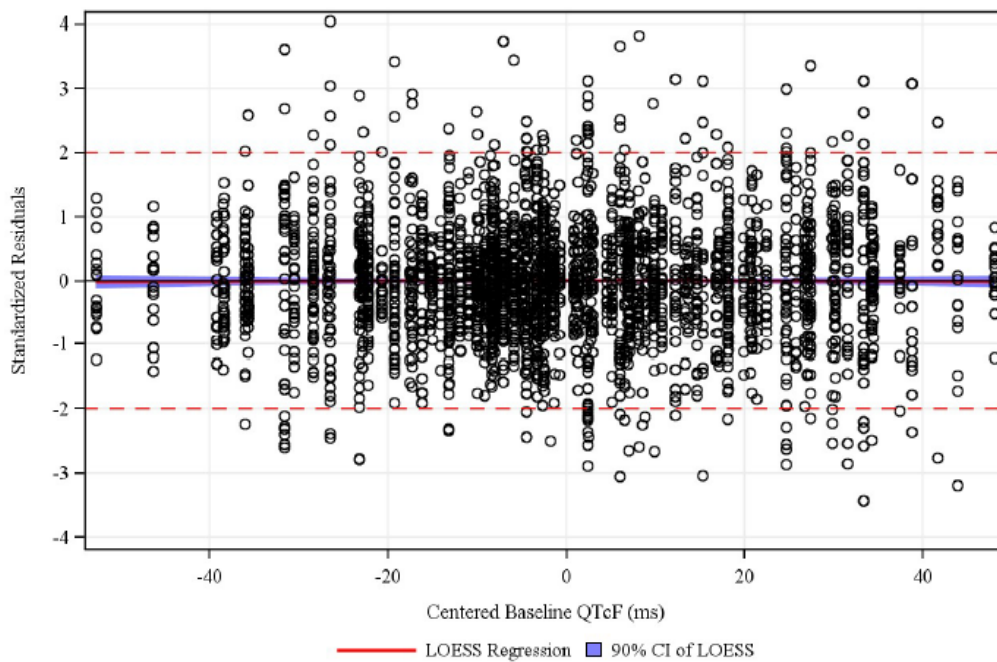

Notes: The red dashed lines are reference lines at  $\pm 2$  while the black solid line is a reference line at 0. The red solid line with blue shaded area denotes the LOESS regression line with 90% CI. CI, confidence interval; LOESS, locally weighted scatter plot smoothing; MAD, multiple-ascending dose; PK, pharmacokinetics; QTc, corrected QT interval; QTcF, QT interval Fridericia's correction; SAD, single-ascending dose.

**Figure S11.** Boxplot of standardized residuals versus time for zavegepant (SAD and MAD pooled data, PK/QTc analysis population)

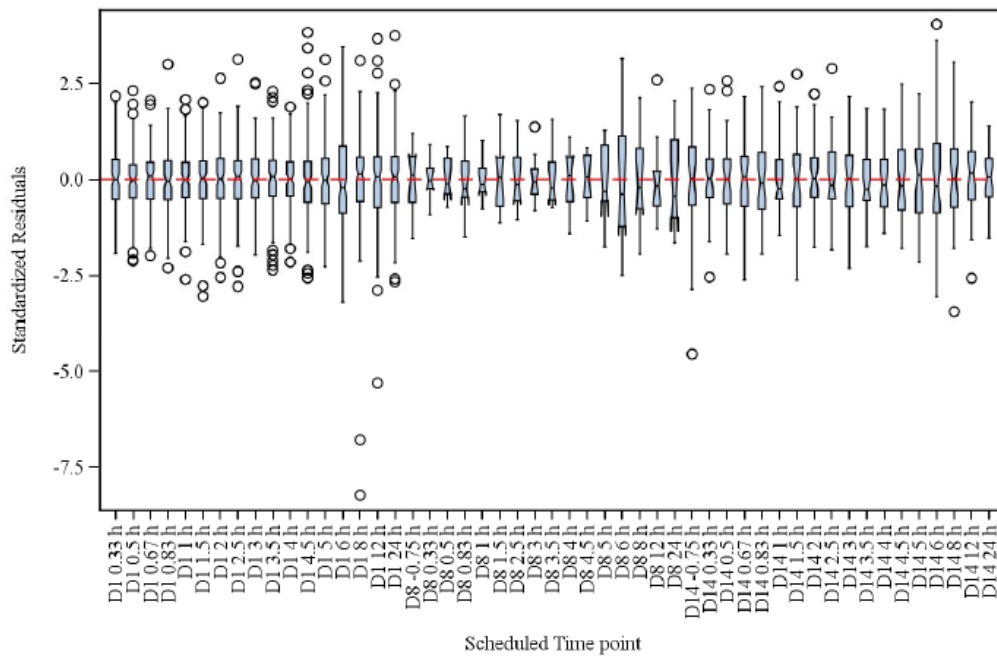

Notes: Notches calculated as  $\text{median} \pm (1.58 \times \text{interquartile range})/\sqrt{n}$ .  
D, day; MAD, multiple-ascending dose; PK, pharmacokinetics; QTc, corrected QT interval; SAD, single-ascending dose.



**Figure S12.** Boxplot of standardized Residuals versus active treatment for zavegepant or placebo (SAD and MAD pooled data, PK/QTc analysis population)

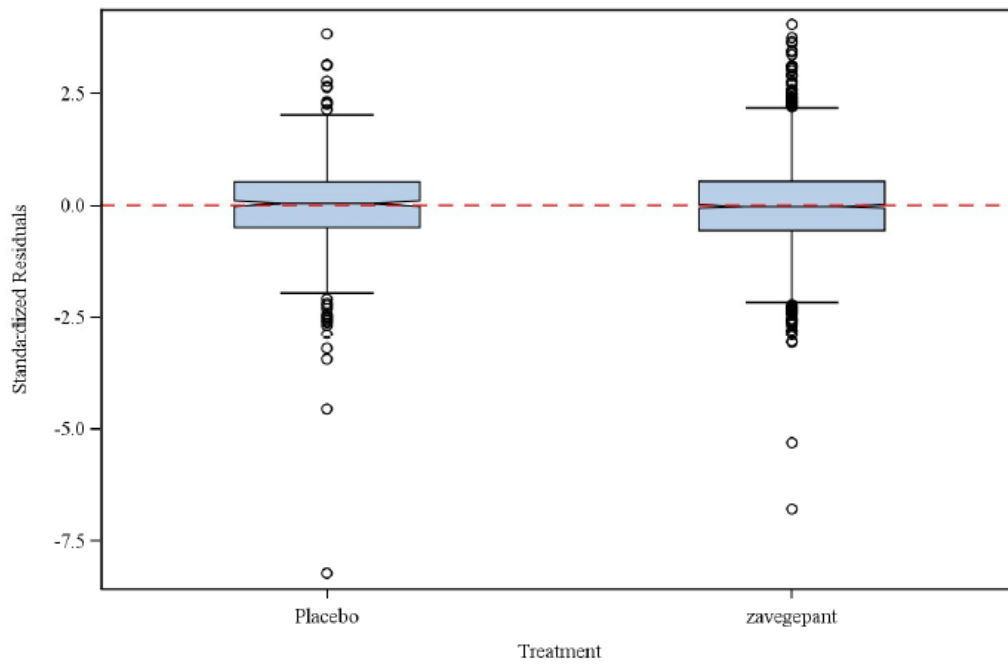

Notes: Notches calculated as  $\text{median} \pm (1.58 \times \text{interquartile range})/\sqrt{n}$ .  
MAD, multiple-ascending dose; PK, pharmacokinetics; QTc, corrected QT interval; SAD, single-ascending dose.

**Figure S13.** Scatter plot of standardized residuals versus zavegepant concentration (SAD and MAD pooled data, PK/QTc analysis population)

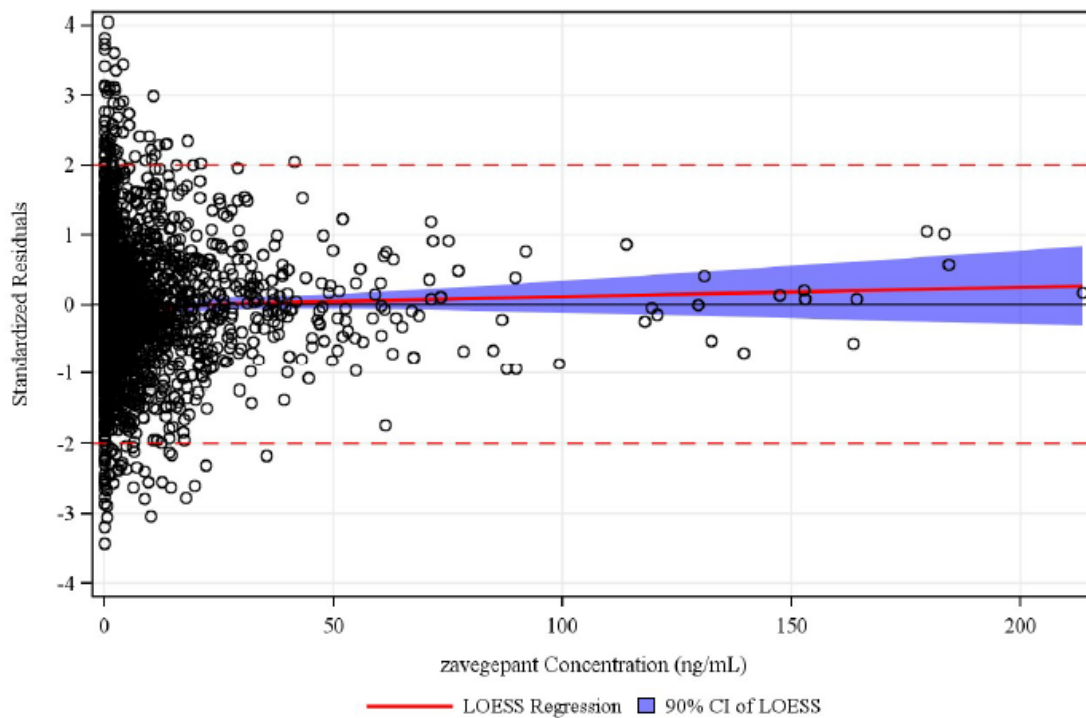

Notes: The red dashed lines are reference lines at  $\pm 2$  while the black solid line is a reference line at 0. The red solid line with blue shaded area denotes the LOESS regression line with 90% CI. CI, confidence interval; LOESS, locally weighted scatter plot smoothing; MAD, multiple-ascending dose; PK, pharmacokinetics; QTc, corrected QT interval; SAD, single-ascending dose.

**Figure S14:** Normal quantile-quantile plot of residuals for zavegepant (SAD and MAD pooled data) (PK/QTc population)

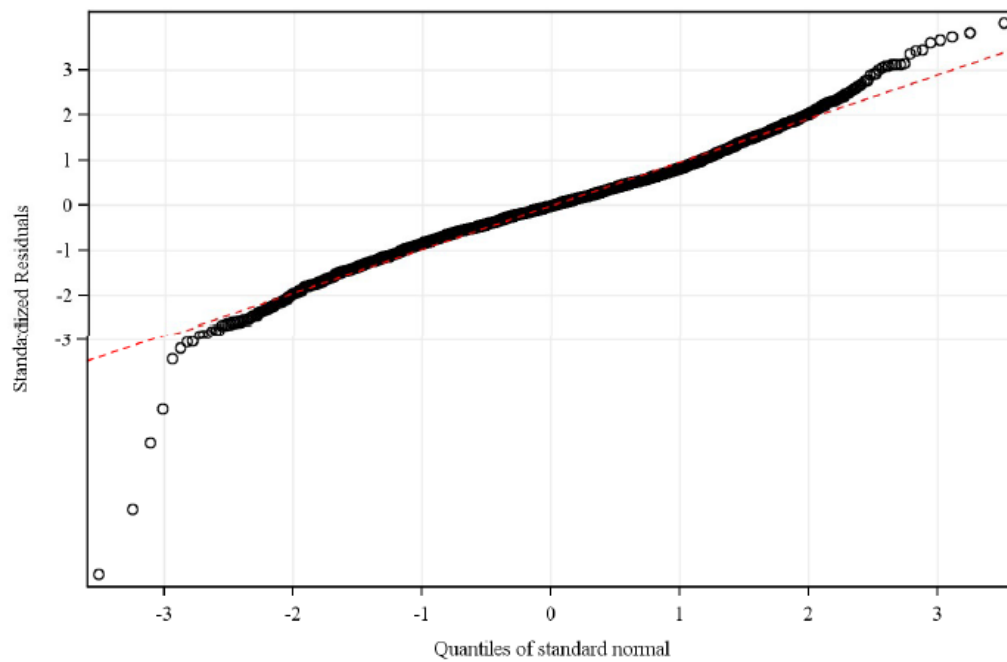

Notes: The red dashed line denotes theoretical cumulative distribution function. MAD, multiple-ascending dose; PK, pharmacokinetics; QTc, corrected QT interval; SAD, single-ascending dose

**Figure S15.** Model-predicted  $\Delta\Delta\text{QTcF}$  (mean and 90% CI) and estimated  $\Delta\Delta\text{QTcF}$  (mean and 90% CI) across deciles of zavegepant plasma concentrations (SAD and MAD studies pooled) (PK/QTc analysis population)

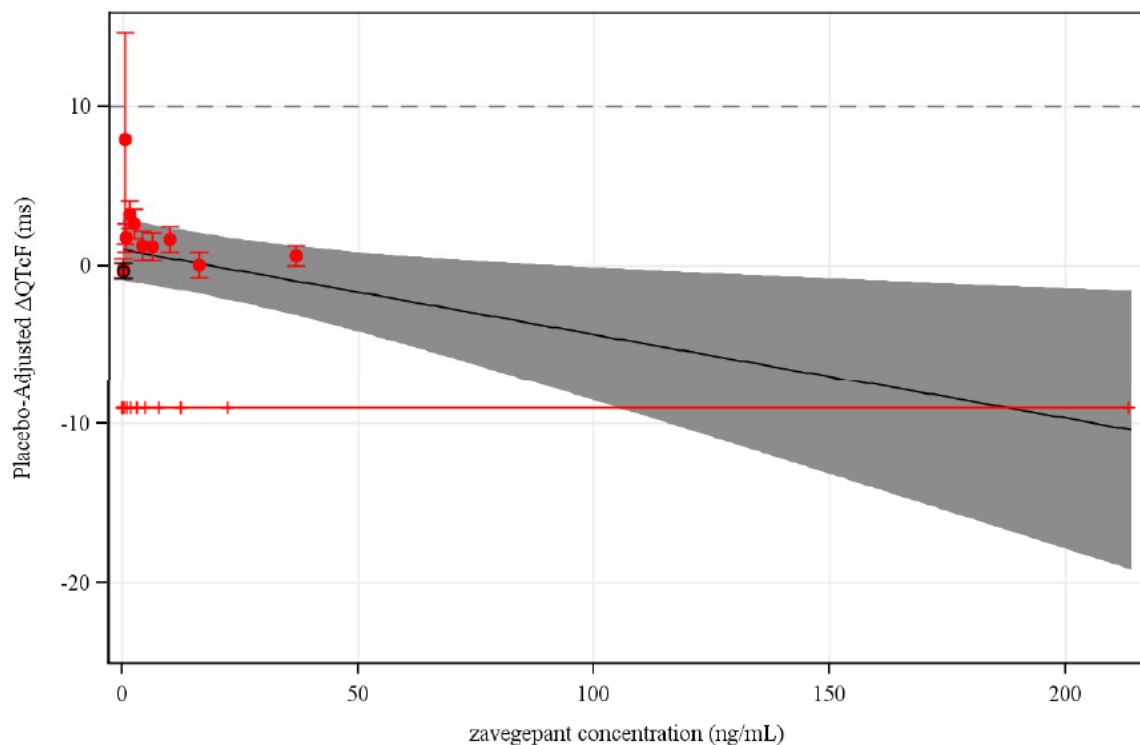

Notes: The solid black line with gray shaded area denotes the model-predicted mean  $\Delta\Delta\text{QTcF}$  with 90% CI, which is calculated from the equation  $\Delta\Delta\text{QTcF} \text{ (ms)} = 0.99 \text{ (ms)} - 0.053 \text{ (ms per ng/mL)} \times \text{zavegepant plasma concentration (ng/mL)}$ . The red filled circles with vertical bars denote the estimated mean  $\Delta\Delta\text{QTcF}$  with 90% CI displayed at the associated median plasma concentration within each decile for zavegepant, among which the individually estimated placebo-adjusted  $\Delta\text{QTcF}_{i,k}$  ( $\Delta\Delta\text{QTcF}_{i,k}$ ) equals the individual  $\Delta\text{QTcF}_{i,k}$  for subject  $i$  administered with zavegepant at time point  $k$  minus the estimation of time effect at time point  $k$ . The black circle with vertical bars denotes the mean placebo-adjusted  $\Delta\text{QTcF}$  with 90% CI for placebo at a concentration of 0. The horizontal red line with notches shows the range of concentrations divided into deciles for zavegepant. The area between each decile represents the point at which 10% of the data are present; the first notch to second notch denotes the first 10% of the data, the second notch to third notch denotes the 10-20% of the data and so on.

$\Delta\Delta\text{QTcF}$ , placebo-corrected change-from-baseline in QT interval using Fridericia's formula;  $\Delta\text{QTcF}$ , change from baseline in corrected QT interval using Fridericia's formula; CI, confidence interval; MAD, multiple-ascending dose; PK, pharmacokinetics; QTc, corrected QT interval; SAD, single-ascending dose;
